# Supplementary material for: Genetic Variation and Recent Positive Selection in Worldwide Human Populations: Evidence from Nearly 1 Million SNPs
Source: PLoS One. 2009 Nov 18;4(11):e7888. doi: 10.1371/journal.pone.0007888 (PMC2775638; doi:10.1371/journal.pone.0007888)
Supplement: Table S1 — List of the 255 HGDP-CEPH individuals genotyped in this study, including ID, population, location, region, population code, gender, heterozygosity for the Affymetrix SNPs, and heterozygosity for the Illumina SNPs. (0.15 MB XLS) [file pone.0007888.s011.xls]

## Sheet: Sheet1
Table S1.
HGDP-CEPH ID	Population	Location	Region	Code	Sex	Heterozygosity Affymetrix	Heterozygosity Illumina
HGDP_00703	Curripaco & Piapoco	Colombia	Americas	COL	M	0.25271	0.272961
HGDP_00708	Curripaco & Piapoco	Colombia	Americas	COL	F	0.208598	0.223738
HGDP_00710	Curripaco & Piapoco	Colombia	Americas	COL	M	0.205039	0.220704
HGDP_00827	Curripaco & Piapoco	Colombia	Americas	COL	F	0.216209	0.234396
HGDP_00970	Curripaco & Piapoco	Colombia	Americas	COL	F	0.223549	0.243019
HGDP_00996	Karitiana	Brazil	Americas	KAR	F	0.215645	0.230306
HGDP_00998	Karitiana	Brazil	Americas	KAR	M	0.203604	0.217802
HGDP_01001	Karitiana	Brazil	Americas	KAR	F	0.214177	0.229581
HGDP_01006	Karitiana	Brazil	Americas	KAR	F	0.202286	0.219484
HGDP_01015	Karitiana	Brazil	Americas	KAR	M	0.205175	0.220934
HGDP_00856	Maya	Mexico	Americas	MAY	M	0.24126	0.261236
HGDP_00860	Maya	Mexico	Americas	MAY	F	0.271016	0.295659
HGDP_00863	Maya	Mexico	Americas	MAY	F	0.254509	0.26883
HGDP_00872	Maya	Mexico	Americas	MAY	F	0.238947	0.259245
HGDP_00877	Maya	Mexico	Americas	MAY	M	0.253356	0.272603
HGDP_01040	Pima	Mexico	Americas	PIM	M	0.231077	0.250146
HGDP_01046	Pima	Mexico	Americas	PIM	F	0.196447	0.214738
HGDP_01049	Pima	Mexico	Americas	PIM	F	0.230285	0.248969
HGDP_01054	Pima	Mexico	Americas	PIM	F	0.214088	0.231225
HGDP_01060	Pima	Mexico	Americas	PIM	M	0.235392	0.254223
HGDP_00832	Surui	Brazil	Americas	SUR	F	0.183265	0.195705
HGDP_00835	Surui	Brazil	Americas	SUR	M	0.196703	0.210278
HGDP_00843	Surui	Brazil	Americas	SUR	M	0.199602	0.213703
HGDP_00845	Surui	Brazil	Americas	SUR	M	0.193046	0.207001
HGDP_00852	Surui	Brazil	Americas	SUR	F	0.189714	0.205746
HGDP_00054	Balochi	Pakistan	Central/South Asia	BAL	M	0.277615	0.3058
HGDP_00062	Balochi	Pakistan	Central/South Asia	BAL	M	0.282456	0.312349
HGDP_00076	Balochi	Pakistan	Central/South Asia	BAL	M	0.293233	0.322403
HGDP_00092	Balochi	Pakistan	Central/South Asia	BAL	M	0.254418	0.275975
HGDP_00098	Balochi	Pakistan	Central/South Asia	BAL	M	0.257863	0.282348
HGDP_00011	Brahui	Pakistan	Central/South Asia	BRA	M	0.280638	0.31108
HGDP_00021	Brahui	Pakistan	Central/South Asia	BRA	M	0.288296	0.316345
HGDP_00029	Brahui	Pakistan	Central/South Asia	BRA	M	0.294845	0.325444
HGDP_00037	Brahui	Pakistan	Central/South Asia	BRA	M	0.276242	0.303834
HGDP_00047	Brahui	Pakistan	Central/South Asia	BRA	M	0.287334	0.317785
HGDP_00338	Burusho	Pakistan	Central/South Asia	BUR	F	0.289629	0.317842
HGDP_00359	Burusho	Pakistan	Central/South Asia	BUR	M	0.282545	0.310554
HGDP_00402	Burusho	Pakistan	Central/South Asia	BUR	M	0.285913	0.315234
HGDP_00407	Burusho	Pakistan	Central/South Asia	BUR	M	0.282247	0.311254
HGDP_00438	Burusho	Pakistan	Central/South Asia	BUR	M	0.285293	0.313659
HGDP_00102	Hazara	Pakistan	Central/South Asia	HAZ	M	0.305979	0.316111
HGDP_00106	Hazara	Pakistan	Central/South Asia	HAZ	M	0.288663	0.313376
HGDP_00118	Hazara	Pakistan	Central/South Asia	HAZ	M	0.28408	0.311183
HGDP_00121	Hazara	Pakistan	Central/South Asia	HAZ	M	0.284073	0.310237
HGDP_00127	Hazara	Pakistan	Central/South Asia	HAZ	M	0.28305	0.308834
HGDP_00274	Kalash	Pakistan	Central/South Asia	KAL	F	0.265283	0.293146
HGDP_00281	Kalash	Pakistan	Central/South Asia	KAL	M	0.276212	0.304411
HGDP_00290	Kalash	Pakistan	Central/South Asia	KAL	M	0.276779	0.302797
HGDP_00319	Kalash	Pakistan	Central/South Asia	KAL	M	0.271396	0.298045
HGDP_00328	Kalash	Pakistan	Central/South Asia	KAL	M	0.260469	0.289069
HGDP_00130	Makrani	Pakistan	Central/South Asia	MAK	M	0.308063	0.33337
HGDP_00136	Makrani	Pakistan	Central/South Asia	MAK	M	0.289505	0.316744
HGDP_00141	Makrani	Pakistan	Central/South Asia	MAK	M	0.275657	0.302251
HGDP_00154	Makrani	Pakistan	Central/South Asia	MAK	F	0.270409	0.295123
HGDP_00160	Makrani	Pakistan	Central/South Asia	MAK	M	0.285336	0.31491
HGDP_00213	Pathan	Pakistan	Central/South Asia	PAT	M	0.285824	0.31412
HGDP_00222	Pathan	Pakistan	Central/South Asia	PAT	M	0.288853	0.316483
HGDP_00230	Pathan	Pakistan	Central/South Asia	PAT	M	0.285554	0.315641
HGDP_00244	Pathan	Pakistan	Central/South Asia	PAT	F	0.281235	0.308398
HGDP_00262	Pathan	Pakistan	Central/South Asia	PAT	M	0.273852	0.298587
HGDP_00163	Sindhi	Pakistan	Central/South Asia	SIN	M	0.272078	0.298853
HGDP_00175	Sindhi	Pakistan	Central/South Asia	SIN	M	0.309191	0.336474
HGDP_00187	Sindhi	Pakistan	Central/South Asia	SIN	M	0.287879	0.316333
HGDP_00201	Sindhi	Pakistan	Central/South Asia	SIN	M	0.282577	0.312244
HGDP_00208	Sindhi	Pakistan	Central/South Asia	SIN	M	0.271988	0.295645
HGDP_01297	Uygur	China	Central/South Asia	UYG	M	0.294299	0.316651
HGDP_01300	Uygur	China	Central/South Asia	UYG	M	0.288508	0.314556
HGDP_01301	Uygur	China	Central/South Asia	UYG	M	0.29535	0.316735
HGDP_01302	Uygur	China	Central/South Asia	UYG	M	0.277897	0.298414
HGDP_01306	Uygur	China	Central/South Asia	UYG	F	0.296062	0.317703
HGDP_00713	Cambodian	Cambodia	East Asia	CAM	F	0.270323	0.290826
HGDP_00715	Cambodian	Cambodia	East Asia	CAM	M	0.268609	0.294028
HGDP_00716	Cambodian	Cambodia	East Asia	CAM	M	0.268383	0.289378
HGDP_00720	Cambodian	Cambodia	East Asia	CAM	M	0.27127	0.291806
HGDP_00721	Cambodian	Cambodia	East Asia	CAM	F	0.261906	0.285961
HGDP_01308	Dai	China	East Asia	DAI	M	0.261967	0.282004
HGDP_01310	Dai	China	East Asia	DAI	M	0.258883	0.278294
HGDP_01313	Dai	China	East Asia	DAI	M	0.256287	0.27673
HGDP_01315	Dai	China	East Asia	DAI	F	0.253439	0.274281
HGDP_01316	Dai	China	East Asia	DAI	F	0.252595	0.275253
HGDP_01213	Daur	China	East Asia	DAU	M	0.261008	0.282367
HGDP_01214	Daur	China	East Asia	DAU	M	0.266121	0.287805
HGDP_01217	Daur	China	East Asia	DAU	M	0.260618	0.281571
HGDP_01221	Daur	China	East Asia	DAU	M	0.262132	0.283823
HGDP_01222	Daur	China	East Asia	DAU	F	0.264568	0.285009
HGDP_00774	Han	China	East Asia	HAN	M	0.264647	0.283028
HGDP_00812	Han	China	East Asia	HAN	F	0.262362	0.281923
HGDP_00973	Han	China	East Asia	HAN	M	0.258929	0.278077
HGDP_01023	Han	China	East Asia	HAN	F	0.261386	0.282258
HGDP_01291	Han	China	East Asia	HAN	F	0.262927	0.282891
HGDP_01233	Hezhen	China	East Asia	HEZ	M	0.264974	not typed
HGDP_01236	Hezhen	China	East Asia	HEZ	M	0.261428	0.282616
HGDP_01239	Hezhen	China	East Asia	HEZ	F	0.262352	0.284747
HGDP_01240	Hezhen	China	East Asia	HEZ	M	0.25526	0.277391
HGDP_01242	Hezhen	China	East Asia	HEZ	F	0.261907	0.282833
HGDP_00749	Japanese	Japan	East Asia	JAP	M	0.260032	0.279561
HGDP_00758	Japanese	Japan	East Asia	JAP	M	0.258281	0.278031
HGDP_00762	Japanese	Japan	East Asia	JAP	M	0.258827	0.280458
HGDP_00765	Japanese	Japan	East Asia	JAP	F	0.246286	0.268432
HGDP_00790	Japanese	Japan	East Asia	JAP	M	0.261949	0.281442
HGDP_01318	Lahu	China	East Asia	LAH	M	0.250513	0.268935
HGDP_01319	Lahu	China	East Asia	LAH	M	0.259138	0.279665
HGDP_01321	Lahu	China	East Asia	LAH	M	0.252339	0.273474
HGDP_01324	Lahu	China	East Asia	LAH	F	0.260536	0.281305
HGDP_01326	Lahu	China	East Asia	LAH	M	0.257155	0.278093
HGDP_01189	Miaozu	China	East Asia	MIA	M	0.259927	0.279571
HGDP_01191	Miaozu	China	East Asia	MIA	M	0.257831	0.276171
HGDP_01192	Miaozu	China	East Asia	MIA	M	0.256939	0.275649
HGDP_01195	Miaozu	China	East Asia	MIA	M	0.257647	0.27838
HGDP_01198	Miaozu	China	East Asia	MIA	F	0.26037	0.278735
HGDP_01224	Mongola	China	East Asia	MON	M	0.264794	0.285938
HGDP_01225	Mongola	China	East Asia	MON	M	0.269296	0.288241
HGDP_01227	Mongola	China	East Asia	MON	M	0.266705	0.288258
HGDP_01230	Mongola	China	East Asia	MON	M	0.266993	0.288857
HGDP_01232	Mongola	China	East Asia	MON	F	0.270066	0.289483
HGDP_01337	Naxi	China	East Asia	NAX	M	0.261525	0.282673
HGDP_01340	Naxi	China	East Asia	NAX	M	0.264138	0.28346
HGDP_01342	Naxi	China	East Asia	NAX	M	0.261771	0.283039
HGDP_01344	Naxi	China	East Asia	NAX	M	0.258341	not typed
HGDP_01346	Naxi	China	East Asia	NAX	F	0.258916	0.279925
HGDP_01203	Oroqen	China	East Asia	ORO	M	0.252488	0.274721
HGDP_01204	Oroqen	China	East Asia	ORO	M	0.26523	0.284111
HGDP_01207	Oroqen	China	East Asia	ORO	M	0.264303	0.28352
HGDP_01208	Oroqen	China	East Asia	ORO	M	0.264415	0.28607
HGDP_01209	Oroqen	China	East Asia	ORO	F	0.262483	0.282253
HGDP_01327	She	China	East Asia	SHE	M	0.25525	0.275255
HGDP_01330	She	China	East Asia	SHE	M	0.254786	0.275377
HGDP_01332	She	China	East Asia	SHE	M	0.258033	0.279114
HGDP_01335	She	China	East Asia	SHE	F	0.253326	0.272058
HGDP_01336	She	China	East Asia	SHE	F	0.263139	0.280172
HGDP_01347	Tu	China	East Asia	TU	M	0.268252	0.289109
HGDP_01348	Tu	China	East Asia	TU	M	0.266711	0.289352
HGDP_01350	Tu	China	East Asia	TU	M	0.272019	0.294212
HGDP_01353	Tu	China	East Asia	TU	M	0.268994	0.291181
HGDP_01355	Tu	China	East Asia	TU	F	0.264262	0.291588
HGDP_01095	Tujia	China	East Asia	TUJ	M	0.26013	0.278471
HGDP_01096	Tujia	China	East Asia	TUJ	M	0.262836	0.282327
HGDP_01100	Tujia	China	East Asia	TUJ	M	0.2652	0.281574
HGDP_01101	Tujia	China	East Asia	TUJ	M	0.260264	0.280819
HGDP_01104	Tujia	China	East Asia	TUJ	M	0.263705	0.278605
HGDP_01244	Xibo	China	East Asia	XIB	M	0.267224	0.284827
HGDP_01245	Xibo	China	East Asia	XIB	M	0.263792	0.283536
HGDP_01248	Xibo	China	East Asia	XIB	M	0.271851	0.29248
HGDP_01250	Xibo	China	East Asia	XIB	M	0.266358	0.288896
HGDP_01251	Xibo	China	East Asia	XIB	F	0.260974	0.283605
HGDP_00945	Yakut	Siberia	East Asia	YAK	M	0.258974	0.280469
HGDP_00951	Yakut	Siberia	East Asia	YAK	M	0.26216	0.282852
HGDP_00958	Yakut	Siberia	East Asia	YAK	M	0.264214	0.285969
HGDP_00963	Yakut	Siberia	East Asia	YAK	F	0.265158	0.280734
HGDP_00968	Yakut	Siberia	East Asia	YAK	M	0.270093	0.290088
HGDP_01181	Yizu	China	East Asia	YIZ	M	0.262436	0.281232
HGDP_01182	Yizu	China	East Asia	YIZ	M	0.253917	0.271119
HGDP_01184	Yizu	China	East Asia	YIZ	M	0.25996	0.280339
HGDP_01187	Yizu	China	East Asia	YIZ	M	0.259923	0.281415
HGDP_01188	Yizu	China	East Asia	YIZ	F	0.263221	0.282097
HGDP_01381	Adygei	Caucasus	Europe	ADY	F	0.282737	0.309319
HGDP_01382	Adygei	Caucasus	Europe	ADY	F	0.283725	0.310219
HGDP_01385	Adygei	Caucasus	Europe	ADY	M	0.286522	0.314577
HGDP_01396	Adygei	Caucasus	Europe	ADY	M	0.280749	0.316111
HGDP_01400	Adygei	Caucasus	Europe	ADY	F	0.288648	0.313266
HGDP_01360	Basque	France	Europe	BAS	M	0.275055	0.302642
HGDP_01361	Basque	France	Europe	BAS	M	0.275919	0.307816
HGDP_01369	Basque	France	Europe	BAS	F	0.278257	0.308617
HGDP_01376	Basque	France	Europe	BAS	M	0.276803	0.304444
HGDP_01379	Basque	France	Europe	BAS	M	0.276366	0.305209
HGDP_01149	Bergamo	Italy	Europe	BER	M	0.260197	not typed
HGDP_01152	Bergamo	Italy	Europe	BER	M	0.280097	0.310381
HGDP_01155	Bergamo	Italy	Europe	BER	M	0.285678	0.31421
HGDP_01173	Bergamo	Italy	Europe	BER	M	0.281704	0.312058
HGDP_01177	Bergamo	Italy	Europe	BER	F	0.274602	0.309299
HGDP_00512	French	France	Europe	FRE	M	0.279729	0.309886
HGDP_00516	French	France	Europe	FRE	F	0.280776	0.312763
HGDP_00521	French	France	Europe	FRE	M	0.277674	0.310637
HGDP_00530	French	France	Europe	FRE	M	0.272471	0.299737
HGDP_00537	French	France	Europe	FRE	F	0.283538	0.311286
HGDP_00795	Orcadian	Orkney Islands	Europe	ORC	M	0.285654	0.314259
HGDP_00797	Orcadian	Orkney Islands	Europe	ORC	F	0.280069	0.309856
HGDP_00801	Orcadian	Orkney Islands	Europe	ORC	F	0.280615	0.310525
HGDP_00806	Orcadian	Orkney Islands	Europe	ORC	F	0.277025	0.304464
HGDP_00810	Orcadian	Orkney Islands	Europe	ORC	M	0.279652	0.306914
HGDP_00880	Russian	Russia	Europe	RUS	M	0.278722	0.312354
HGDP_00886	Russian	Russia	Europe	RUS	M	0.283128	0.313092
HGDP_00891	Russian	Russia	Europe	RUS	M	0.283598	0.313957
HGDP_00898	Russian	Russia	Europe	RUS	F	0.285237	0.312591
HGDP_00902	Russian	Russia	Europe	RUS	F	0.283453	0.312159
HGDP_00668	Sardinian	Italy	Europe	SAR	M	0.272124	0.304092
HGDP_00674	Sardinian	Italy	Europe	SAR	M	0.271066	0.30178
HGDP_01063	Sardinian	Italy	Europe	SAR	M	0.272247	0.303557
HGDP_01067	Sardinian	Italy	Europe	SAR	M	0.267102	0.297407
HGDP_01073	Sardinian	Italy	Europe	SAR	M	0.274371	0.305026
HGDP_01161	Tuscan	Italy	Europe	TUS	M	0.280815	0.309872
HGDP_01162	Tuscan	Italy	Europe	TUS	M	0.281291	0.313087
HGDP_01164	Tuscan	Italy	Europe	TUS	M	0.285723	0.312032
HGDP_01168	Tuscan	Italy	Europe	TUS	F	0.279352	0.306499
HGDP_01169	Tuscan	Italy	Europe	TUS	F	0.282156	0.310127
HGDP_00490	Nasioi	Bougainville	Melanesia	NAS	M	0.230934	0.24831
HGDP_00656	Nasioi	Bougainville	Melanesia	NAS	F	0.230884	0.24965
HGDP_00657	Nasioi	Bougainville	Melanesia	NAS	F	0.227066	0.24547
HGDP_00789	Nasioi	Bougainville	Melanesia	NAS	M	0.228016	0.243666
HGDP_00825	Nasioi	Bougainville	Melanesia	NAS	F	0.228147	0.244821
HGDP_00541	Papuan	NewGuinea	Melanesia	PAP	M	0.204088	0.220858
HGDP_00546	Papuan	NewGuinea	Melanesia	PAP	M	0.200446	0.219048
HGDP_00549	Papuan	NewGuinea	Melanesia	PAP	M	0.209118	0.224091
HGDP_00553	Papuan	NewGuinea	Melanesia	PAP	M	0.211521	0.223733
HGDP_00556	Papuan	NewGuinea	Melanesia	PAP	M	0.206277	0.222869
HGDP_00608	Bedouin	Israel	Middle East	BED	M	0.274583	0.302487
HGDP_00614	Bedouin	Israel	Middle East	BED	F	0.285488	0.313653
HGDP_00624	Bedouin	Israel	Middle East	BED	M	0.277738	0.30738
HGDP_00633	Bedouin	Israel	Middle East	BED	M	0.260673	0.289201
HGDP_00650	Bedouin	Israel	Middle East	BED	F	0.276174	0.305129
HGDP_00559	Druze	Israel	Middle East	DRU	F	0.271517	0.299014
HGDP_00564	Druze	Israel	Middle East	DRU	F	0.262229	0.290479
HGDP_00568	Druze	Israel	Middle East	DRU	F	0.262182	0.287363
HGDP_00575	Druze	Israel	Middle East	DRU	F	0.278071	0.309558
HGDP_00600	Druze	Israel	Middle East	DRU	M	0.281	0.309139
HGDP_01254	Mozabite	Algeria	Middle East	MOZ	F	0.288764	0.313638
HGDP_01260	Mozabite	Algeria	Middle East	MOZ	M	0.280011	0.3062
HGDP_01264	Mozabite	Algeria	Middle East	MOZ	M	0.286484	0.31545
HGDP_01273	Mozabite	Algeria	Middle East	MOZ	F	0.293694	0.321499
HGDP_01282	Mozabite	Algeria	Middle East	MOZ	M	0.291915	0.317604
HGDP_00675	Palestinian	Israel	Middle East	PAL	M	0.282614	0.308217
HGDP_00681	Palestinian	Israel	Middle East	PAL	F	0.288788	0.317667
HGDP_00690	Palestinian	Israel	Middle East	PAL	F	0.286256	0.315077
HGDP_00724	Palestinian	Israel	Middle East	PAL	M	0.272588	0.301196
HGDP_00745	Palestinian	Israel	Middle East	PAL	F	0.271924	0.299397
HGDP_01405	Bantu	Kenya	Sub-Saharan Africa	BAN	M	0.290785	0.30742
HGDP_01408	Bantu	Kenya	Sub-Saharan Africa	BAN	M	0.289089	0.304959
HGDP_01413	Bantu	Kenya	Sub-Saharan Africa	BAN	M	0.296143	0.311135
HGDP_01416	Bantu	Kenya	Sub-Saharan Africa	BAN	M	0.292274	0.313211
HGDP_01419	Bantu	Kenya	Sub-Saharan Africa	BAN	M	0.291237	0.307057
HGDP_00452	Biaka Pygmy	Central Africa Republic	Sub-Saharan Africa	BIA	M	0.267794	not typed
HGDP_00464	Biaka Pygmy	Central Africa Republic	Sub-Saharan Africa	BIA	M	0.267943	0.284628
HGDP_00472	Biaka Pygmy	Central Africa Republic	Sub-Saharan Africa	BIA	M	0.271996	0.286417
HGDP_01085	Biaka Pygmy	Central Africa Republic	Sub-Saharan Africa	BIA	F	0.271896	0.287901
HGDP_01091	Biaka Pygmy	Central Africa Republic	Sub-Saharan Africa	BIA	M	0.270582	0.28676
HGDP_00909	Mandenka	Senegal	Sub-Saharan Africa	MAN	F	0.285624	0.304434
HGDP_00911	Mandenka	Senegal	Sub-Saharan Africa	MAN	M	0.272457	0.291765
HGDP_00917	Mandenka	Senegal	Sub-Saharan Africa	MAN	F	0.291063	0.305591
HGDP_00918	Mandenka	Senegal	Sub-Saharan Africa	MAN	F	0.288792	0.308085
HGDP_01199	Mandenka	Senegal	Sub-Saharan Africa	MAN	M	0.286295	0.304549
HGDP_00449	Mbuti Pygmy	D.R. Congo	Sub-Saharan Africa	MBU	M	0.251585	0.263812
HGDP_00456	Mbuti Pygmy	D.R. Congo	Sub-Saharan Africa	MBU	M	0.249041	0.260702
HGDP_00463	Mbuti Pygmy	D.R. Congo	Sub-Saharan Africa	MBU	M	0.252164	0.262483
HGDP_00468	Mbuti Pygmy	D.R. Congo	Sub-Saharan Africa	MBU	M	0.256543	0.267456
HGDP_00478	Mbuti Pygmy	D.R. Congo	Sub-Saharan Africa	MBU	M	0.250264	0.264021
HGDP_00987	San	Namibia	Sub-Saharan Africa	SAN	M	0.23341	not typed
HGDP_00991	San	Namibia	Sub-Saharan Africa	SAN	M	0.236397	0.246474
HGDP_00992	San	Namibia	Sub-Saharan Africa	SAN	M	0.235958	0.247752
HGDP_01032	San	Namibia	Sub-Saharan Africa	SAN	M	0.236016	0.248024
HGDP_01036	San	Namibia	Sub-Saharan Africa	SAN	M	0.236137	0.247959
HGDP_00921	Yoruba	Nigeria	Sub-Saharan Africa	YOR	F	0.288276	0.305722
HGDP_00928	Yoruba	Nigeria	Sub-Saharan Africa	YOR	F	0.290104	0.306034
HGDP_00932	Yoruba	Nigeria	Sub-Saharan Africa	YOR	M	0.290708	0.30691
HGDP_00938	Yoruba	Nigeria	Sub-Saharan Africa	YOR	F	0.288395	0.303395
HGDP_00942	Yoruba	Nigeria	Sub-Saharan Africa	YOR	M	0.288159	0.303617
ref103	AffymetrixRefDNA	Unknown	Unknown		M	0.281307	not typed
NA06985	HapMapCEU	Utah	Americas		F	0.282587	not typed
