# Supplementary material for: Genetic Variation and Recent Positive Selection in Worldwide Human Populations: Evidence from Nearly 1 Million SNPs
Source: PLoS One. 2009 Nov 18;4(11):e7888. doi: 10.1371/journal.pone.0007888 (PMC2775638; doi:10.1371/journal.pone.0007888)
Supplement: Table S2 — List of the candidate regions for recent positive selection identified in the population-level analyses, including the chromosome, start and end positions, HGNC gene ID, and populations (and signal rank) for which a positive signal was obtained. (0.10 MB XLS) [file pone.0007888.s012.xls]

## Sheet: tab1
Table S2.
Chromosome	Start	End	HGNC gene ID	Population ID(rank)
1	6472963	6750877	PLEKHG5,ZBTB48,KLHL21,PHF13,NOL9,DNAJC11,TAS1R1	Naxi(21)
1	10087903	10749722	PGD,PEX14,CORT,APITD1,KIF1B,UBE4B,DFFA	San(1)
1	18138561	18436476	IGSF21	Bedouin(17)
1	25069864	25392210	RUNX3	Surui(10)
1	30772665	30888584		Biakapygmy(17)
1	35100832	35677767	ZMYM4,ZMYM1,SFPQ,ZMYM6,DLGAP3	Palestinian(10),French(7),Russian(4),Makrani(13), Balochi(5)
1	35590878	36426264	PSMB2,ZMYM4,TRAPPC3,TFAP2E,COL8A2,EIF2C3,ADPRHL2,EIF2C4,TEKT2,EIF2C1	Palestinian(15),Makrani(24)
1	46746168	47061538	CYP4B1,KNCN,DMBX1,KIAA0494,ATPAF1, MOBKL2C,MKNK1	Mozabite(14)
1	48738170	48859794	AGBL4	Biakapygmy(22)
1	48995115	49204351	AGBL4	French(21),Burusho(17),Dai(18)
1	55712582	56408394		Brahui(25),Sindhi(8)
1	62270729	62540541	INADL	Han(25)
1	63004437	63233438	ATG4C	Dai(11),Nasioi(24)
1	64292168	64432904	ROR1	Oroqen(24)
1	65077782	65411518	AK3L1,JAK1	Balochi(17)
1	72609827	73146125		Uygur(5),Yakut(8),Oroqen(17)
1	73589152	74118455		Papuan(23)
1	75434361	76016970	SLC44A5,ACADM	Mongola(22),Hezhen(11),Miaozu(11)
1	76170837	76638179	ST6GALNAC3	Hezhen(14),Naxi(20),Cambodian(13)
1	77525710	77759104	AK5	Japanese(19),Tujia(15)
1	78351271	78589503	GIPC2	Brahui(16),Tujia(7)
1	79045248	79365884		Yoruba(14)
1	79874393	80083621		San(19)
1	82459003	82598691		Yoruba(18)
1	85980337	86459162		Yoruba(8)
1	86686860	86787248		Burusho(10)
1	87382097	87649814	LMO4	Burusho(2)
1	91692370	92020862	TGFBR3,CDC7	Kalash(23)
1	93053376	93392981	TMED5,RPL5,FAM69A,MTF2	Hazara(2),Uygur(3),Naxi(5)
1	94237720	94369419	ABCA4	Kalash(6),Pima(17)
1	94777808	95199836	F3,CNN3	Kalash(15)
1	102479176	103529391	COL11A1	Druze(7),Bergamo(10),Basque(9),Kalash(7), Burusho(12),Sindhi(18),Hazara(8),Yakut(12), Mongola(2),Oroqen(11),Hezhen(12), Daur(2),Japanese(3),Yizu(14),Naxi(10),Tujia(8), Miaozu(4),Dai(3),Lahu(11),Cambodian(1), Nasioi(9),Colombian(22)
1	105369671	105637764		Druze(12),French(5)
1	109504727	109633806	SARS,PSRC1,CELSR2,KIAA1324	French(24)
1	111661435	111880249	CHIA,C1orf162,ATP5F1,ADORA3,OVGP1	San(7)
1	114335021	114685702		Surui(3)
1	115405284	115699858	TSPAN2,NGF	Surui(2)
1	116041156	116237666	VANGL1,CASQ2,NHLH2	Yoruba(16)
1	145637476	145830700	GJA5	Orcadian(2)
1	153067871	153352772	FLAD1,CKS1B,SHC1,EFNA3,PYGO2,PBXIP1, ZBTB7B,DCST1,PMVK,ADAM15,DCST2,EFNA4, KCNN3,LENEP	Hazara(22),Xibo(3),Japanese(1),Naxi(1),Han(1),She(6)
1	160233784	160397105	OLFML2B,NOS1AP	Tuscan(9)
1	161882823	162111202		Bantu(5)
1	165303338	165426232	GPA33,DUSP27	Colombian(24)
1	173251508	173400937	TNN,MRPS14	Burusho(1),Oroqen(15),Cambodian(16),Pima(12)
1	176737845	176957989	C1orf49	Palestinian(22),Miaozu(20)
1	178360310	178510147	QSOX1,LHX4	Russian(23)
1	187787128	188087333		Bergamo(25),Balochi(21),Lahu(15),Maya(19)
1	191716632	192702964		Mozabite(15),Orcadian(21),Naxi(25)
1	195482842	196237903	LHX9,CRB1	Xibo(6),Daur(5),Naxi(13),Surui(7)
1	196341387	196699922	NEK7	Mandenka(23)
1	197284766	197579148		Surui(5)
1	203541298	203876033	ELK4,MFSD4,NUAK2,PCTK3	Nasioi(5)
1	204023107	204182290	SLC41A1	Tujia(1),Nasioi(2)
1	205198194	205322277	PFKFB2,YOD1	Sindhi(5)
1	210822986	210961201	ATF3	San(9)
1	213202375	213312765		Hezhen(17)
1	215982635	216286827	SPATA17	Hazara(11)
1	222887071	223605986	CNIH3	Mandenka(8)
1	242123112	242247498		French(16)
1	243987486	244376453		Palestinian(8),Druze(5),Sardinian(3),Bergamo(8)
1	246003642	246551181	OR2M2,OR2AK2,OR2M3,OR2L13,OR2L3,OR2T8, OR2M4,OR2L8,OR2W3,OR2L2,OR2T12,TRIM58, OR2T33,OR2M5,OR11L1	Bedouin(14),Adygei(6),Sardinian(5),French(8), Basque(6),Kalash(21),Papuan(12)
1	247040508	247177330	ZNF692,ZNF672	Sardinian(14),French(12),Pathan(18)
2	2774213	3151642		Papuan(15)
2	6077658	6312037		Sardinian(24)
2	9124479	9471706	ITGB1BP1,DDEF2	Japanese(16)
2	9668929	9824537	YWHAQ	Japanese(11),Miaozu(8)
2	16800799	17526307		Han(18)
2	17629118	17987829	SMC6,KCNS3,GEN1,VSNL1	Oroqen(3),Han(4),Dai(6),Maya(23),Colombian(13)
2	19812396	19944955		Papuan(13)
2	26351726	26652535	OTOF,HADHB,GPR113	Lahu(24),Maya(20)
2	28160447	28544461	FOSL2,BRE	Mongola(25),Tu(16),Japanese(4),Lahu(9), Nasioi(17),Colombian(11)
2	29143005	29436825	ALK	Hezhen(16),Tujia(3)
2	32735206	33030810	LTBP1,TTC27	Burusho(7)
2	35857714	36098576		Bantu(9)
2	36813389	37159655	STRN,VIT,HEATR5B	Mozabite(6),Tuscan(3)
2	39604533	40022082	THUMPD2,TMEM178	Tuscan(25),Pathan(7),Papuan(14)
2	40121096	40231518	SLC8A1	Sardinian(12)
2	43652574	43977263	ABCG8,LRPPRC,ABCG5,THADA	Russian(11),Daur(17)
2	44396893	44636611	PREPL,SLC3A1	French(9)
2	46563075	46774789	RHOQ,CRIPT,ATP6V1E2,PIGF	Pima(16)
2	46875500	47175726	MCFD2,TTC7A	Yizu(11),Pima(25)
2	51169944	52585423		Hezhen(23),Pima(13)
2	52677986	53119633		Bergamo(17)
2	62264019	62692440	B3GNT2,TMEM17	Biakapygmy(4),Basque(4),Nasioi(1)
2	70403282	70537572	TGFA	Yoruba(7)
2	71541757	72258606	CYP26B1,DYSF	Tu(6),Tujia(10),Colombian(15)
2	72090437	72356501	EXOC6B,CYP26B1	Palestinian(1),Sardinian(20),Makrani(7),Brahui(2), Kalash(24),Burusho(13),Pathan(22),Hazara(4),Uygur(2),Yakut(22),Mongola(19),Tu(18),Xibo(8),Hezhen(6), Yizu(24),Han(6),She(22),Miaozu(3),Lahu(8), Cambodian(3)
2	80565100	80793115	CTNNA2	Pima(24)
2	83876668	84406115		Bantu(8)
2	86304638	86902213	JMJD1A,REEP1,VPS24,CD8A,RNF103	Hezhen(13)
2	88148061	88676466	FABP1,THNSL2,C2orf51,SMYD1,EIF2AK3	Biakapygmy(23),Xibo(10),Han(9),She(4),Dai(2)
2	88502363	88676466	C2orf51,EIF2AK3	Mozabite(22)
2	96804993	97043660	CNNM3,ANKRD23,SEMA4C,CNNM4	Brahui(5),Pathan(6)
2	99575262	99830619	AFF3	Yoruba(3)
2	107975080	108471626	SULT1C3,SULT1C4,SULT1C2,SLC5A7	Mbutipygmy(1),Hezhen(25),Han(23)
2	108858887	109369354	EDAR	Adygei(16),Tuscan(14),Pathan(23),Uygur(9),Xibo(4), Oroqen(7),Hezhen(3),Daur(8),Japanese(9),Yizu(15), Naxi(15),Tujia(6),Han(3),Lahu(25),Maya(10),Pima(19)
2	111422697	111529088	ACOXL	Pima(11)
2	116051271	116251392	DPP10	Druze(10)
2	121664777	121861627	TFCP2L1	Tuscan(22)
2	124522759	124803137		Bantu(20)
2	125014383	126220205		Han(13),She(17),Dai(23)
2	125685770	126188079		Naxi(23)
2	134144243	135461599	CCNT2,YSK4,ACMSD,TMEM163,MGAT5	Bedouin(5),Uygur(23)
2	136123548	136915796	MCM6,LCT,UBXN4,CXCR4,DARS,R3HDM1	Bedouin(2),Brahui(21)
2	140911097	142352930	LRP1B	Bedouin(19),Sindhi(24)
2	141792031	142234138	LRP1B	Bedouin(21)
2	151375954	151918988	RBM43,NMI	Palestinian(6),Papuan(18),Maya(15),Colombian(2),Karitiana(11)
2	152204772	153231209	PRPF40A,CACNB4,STAM2,ARL5A	Druze(4),Tuscan(5),French(19),Russian(8),Russian(2),Brahui(14),Mongola(9),Oroqen(13),Yizu(10), Nasioi(13),Colombian(8),Colombian(4)
2	159269465	159496831		Tujia(11),She(16),Dai(10),Colombian(14),Karitiana(13)
2	161428018	161729164	TANK	Karitiana(7)
2	165722473	166234496	SCN2A	Palestinian(11),Nasioi(10),Papuan(9)
2	167495240	167836130		Basque(14)
2	170705307	170813564	MYO3B	Cambodian(22)
2	177046687	177646172		Uygur(14),Mongola(17),Xibo(24),Hezhen(15), Japanese(8),Yizu(6),Han(21),Miaozu(21),Colombian(16)
2	178152100	178456515	PDE11A	Adygei(19),Tuscan(15),Bergamo(2),French(23), Orcadian(6),Basque(15),Makrani(4),Yakut(14),Tu(11), Hezhen(4),Tujia(18),Papuan(11)
2	178736197	179700946	CCDC141,PLEKHA3,PRKRA,FKBP7,DFNB59, OSBPL6	Makrani(21),Hazara(5)
2	184895389	185234248	ZNF804A	Pima(7)
2	189429238	189720991	COL3A1,COL5A2	Orcadian(17)
2	190058398	190416532	SLC40A1,ORMDL1,ANKAR,OSGEPL1,PMS1	Bergamo(23),Orcadian(12),Mongola(16),Tu(12), Hezhen(24),Japanese(20),Yizu(22)
2	196403147	197030873	STK17B,HECW2	Makrani(6),Hazara(17)
2	196871047	197112959	HECW2	Tuscan(7),Basque(13)
2	197536896	197803016		Balochi(13),Japanese(22)
2	198513430	199310170		Druze(8),Han(15),Cambodian(20)
2	208912959	209182468	PIP5K3,PTH2R	Mozabite(17)
2	217991426	218112453		Papuan(20)
2	218754682	218980538	SLC11A1,PNKD,AAMP,TMBIM1,ARPC2,CTDSP1	Hazara(18),Uygur(22)
2	232452453	232646827	NPPC,DIS3L2	San(21)
2	232784664	232947987	DIS3L2	San(3)
2	234244879	234502476	UGT1A5,TRPM8,UGT1A8,DNAJB3,UGT1A10, UGT1A6,UGT1A7,UGT1A3,UGT1A1,UGT1A9, UGT1A4	Kalash(14)
2	237087269	237294597	CXCR7	Nasioi(22)
3	315312	442157	CHL1	Bedouin(16)
3	3394888	3535143		Makrani(14)
3	5689159	5866539		Bergamo(1)
3	7641784	7815349	GRM7	Dai(14)
3	26380244	26664148	LRRC3B	Mandenka(14)
3	29297301	29596111	RBMS3	Biakapygmy(11)
3	30770702	31459577	GADL1	Balochi(9),Pathan(11)
3	35343486	35925050	ARPP-21	Mozabite(5),Druze(11),Makrani(10),Han(8)
3	37837722	38119879	PLCD1,VILL,DLEC1,CTDSPL	Bantu(17)
3	38297630	38401120	SLC22A14	Sindhi(1)
3	38926441	39629506	RPSA,SLC25A38,WDR48,SCN11A,CCR8,CX3CR1, AXUD1,TTC21A,GORASP1	Palestinian(17),Uygur(18),Tu(23),Cambodian(23)
3	43025418	43231235	C3orf39	Tu(19)
3	43759421	43871180		Miaozu(22)
3	48291038	48724068	UQCRC1,UCN2,SLC26A6,TMEM89,ATRIP,CELSR3,PLXNB1,IHPK2,COL7A1,PFKFB4,NCKIPSD, CCDC51,FBXW12,NME6,TREX1	Mongola(24),Japanese(17),Tujia(21),Cambodian(25)
3	55911551	56233367	ERC2	Basque(21)
3	59664225	59840425	FHIT	Bedouin(11)
3	66394463	66616468	LRIG1	Bedouin(3),Brahui(6),Sindhi(10)
3	70523452	72178503	GPR27,PROK2,FOXP1	Kalash(2)
3	74997691	75361048		San(5)
3	83737496	84114282		Palestinian(25)
3	100280863	100898048	COL8A1	Daur(24)
3	104310640	104539962		Tuscan(16),Basque(5)
3	108971429	109230362	BBX	Balochi(19),Uygur(19),Japanese(18),Surui(4)
3	111179292	111566993		Basque(17)
3	112888778	113011229		Sindhi(22)
3	119477874	119712060		San(20),Surui(21)
3	121964468	122183640	GTF2E1,STXBP5L	Mbutipygmy(12),Mongola(11)
3	140292959	140463747		Bedouin(6)
3	141580232	141813475	CLSTN2	Basque(18)
3	164820983	165145118		Bantu(18)
3	168403309	168786883	SERPINI2,ZBBX	Druze(16),Yizu(7),Tujia(17),Han(5)
3	169116118	169274700	GOLIM4	Naxi(19)
3	171640822	171746014	SLC7A14	Pathan(9)
3	180465203	180690286	ZNF639,MFN1,GNB4	Hazara(9),Nasioi(15)
3	183842034	183978835		Adygei(18)
4	5376343	5691249	C4orf6,STK32B,EVC2	Sindhi(7),Oroqen(21)
4	14162134	14287284		Palestinian(20)
4	29352266	29825355		Pathan(16)
4	30004616	30255932		Druze(25)
4	32215180	33054072		Balochi(15)
4	35458640	35754466	CENTD1	Uygur(1),Yakut(2),Yizu(4),She(1),Cambodian(2), Pima(2)
4	41061846	41578240	PHOX2B,LIMCH1	Xibo(21),Daur(14),Han(17)
4	41805476	42148010	ATP8A1	Adygei(15),Sardinian(9),Sindhi(2),Hazara(7),Yakut(7), Mongola(5),Oroqen(18),Hezhen(7)
4	57595390	57777311	IGFBP7	Mbutipygmy(20)
4	60371869	61231039		Mozabite(2),Sardinian(8),Sardinian(11),Basque(10), Russian(6),Pathan(20),Maya(8)
4	65329533	65611092		Russian(1)
4	72560254	73020113	SLC4A4,GC	Adygei(11),Tuscan(8),Karitiana(24)
4	74473542	74807802	AFM,ALB,RASSF6,AFP	Yoruba(19)
4	74934145	75091309	CXCL5,PF4,CXCL1,PF4V1	Druze(20),Uygur(11),Mongola(13),Naxi(18)
4	79193155	79863303	ANXA3	Sardinian(19),Kalash(8),Hezhen(20)
4	82038098	82848336	PRKG2,BMP3,RASGEF1B	Sardinian(15),Tuscan(12),Orcadian(10),Balochi(23), Kalash(18),Sindhi(4)
4	83792324	83920022	SCD5	Basque(8)
4	86921136	87185351	ARHGAP24,MAPK10	Tuscan(20)
4	88500206	88722898	NUDT9,HSD17B11,SPARCL1	Pima(8)
4	96417342	96764446		Mozabite(4)
4	100466593	100893763	RG9MTD2,MTTP,ADH7	Japanese(12)
4	103564116	103852010	NFKB1,MANBA	San(23)
4	104604944	104773325	TACR3	Adygei(3)
4	106701684	106882683	INTS12	Bedouin(12)
4	122785414	122961667	ANXA5,CCNA2,EXOSC9,TMEM155	Oroqen(12)
4	124895229	125764176		Mandenka(20)
4	125902746	126105461		Miaozu(1)
4	126659653	126955822		Mandenka(25)
4	130250094	130350364		Yoruba(9)
4	133576654	133905883		Adygei(20)
4	140633064	140768163	SETD7	Druze(24)
4	143176228	144923530	SMARCA5,GAB1,USP38	Mbutipygmy(24),Hazara(13),Han(19)
4	145422981	145852980	HHIP	Brahui(10)
4	147372261	147543305	SLC10A7	Bantu(21)
4	148007195	148263474	TTC29	Bedouin(23),Tuscan(11),Sindhi(9)
4	158542446	159076443		Bergamo(18),Basque(23),Russian(21),Brahui(12), Yakut(15),Tu(4),Xibo(9),Oroqen(19),Hezhen(21), Daur(18),Yizu(18),Naxi(14),Dai(17),Lahu(16),Maya(7)
4	160402980	160850092	RAPGEF2	Yakut(16),Yizu(23)
4	167856715	168299577	SPOCK3	Biakapygmy(21)
4	168497094	168884024		Biakapygmy(5)
4	170208492	170559688	NEK1	Mozabite(7)
4	171660401	172097373		Bedouin(8),Palestinian(16),French(10),Brahui(20), Sindhi(20)
5	8581293	9073150		Mandenka(16),Hazara(15)
5	12086902	12834239		Balochi(11)
5	13241629	13429525		Basque(19)
5	15650087	15991553	FBXL7	Yoruba(12)
5	19529441	20697804	CDH18	Bedouin(25),French(3),Russian(7),Balochi(20), Burusho(23)
5	20950456	21280371		French(4),Makrani(18)
5	24491013	25166456	CDH10	Mbutipygmy(9),Basque(7)
5	30609959	30955623		Bantu(25)
5	37754876	37961214	GDNF	Russian(5),Daur(21)
5	37958647	38154390		Hazara(25)
5	42044756	43419155	GHR,CCL28,HMGCS1,C5orf39,MGC42105	Japanese(23),Lahu(23)
5	52211483	52528690	ITGA1,MOCS2,ITGA2	Bedouin(22)
5	61007489	61227769		Colombian(20)
5	63891866	64075627	RGS7BP,SFRS12IP1	San(14),Nasioi(11)
5	65087560	65240373	NLN	Pima(15)
5	65794615	66046930	MAST4	Mandenka(7)
5	68138961	68647720	SLC30A5,MRPS36,CDK7,CENPH,CCNB1	Mbutipygmy(3),Burusho(9),Nasioi(19)
5	70800637	71275894	CARTPT	Yoruba(23),Hazara(1),Yakut(1),Mongola(1),Xibo(2), Oroqen(1),Hezhen(1),Maya(1)
5	74251060	74376083	GCNT4	Orcadian(20)
5	74915646	75048792	POLK	Orcadian(7)
5	81000208	81254015	SSBP2	San(17)
5	81879482	82366107		Karitiana(6)
5	89821799	90038352	LYSMD3,GPR98	Bantu(23)
5	90248032	90518610	GPR98	Hazara(24)
5	102189650	102617353	HISPPD1,PAM	Yoruba(1)
5	104230611	104554013		Makrani(25),Han(14)
5	106871751	107464924	EFNA5	Surui(25)
5	107958153	108090529		Daur(20)
5	108856586	109028224		Yakut(23)
5	109524859	110330243	SLC25A46	Mozabite(9),Adygei(13),Tuscan(2),Orcadian(4), Brahui(15),Pathan(5)
5	112377196	112753379	MCC,DCP2	Brahui(7),Mongola(15)
5	112965805	113161743		Brahui(8)
5	130059251	131192905	FNIP1,RAPGEF6,HINT1	Mbutipygmy(19)
5	131314824	131464860	IL3,ACSL6,CSF2	Mbutipygmy(10)
5	145981347	146228153	PPP2R2B	Sindhi(11)
5	150352740	150636741	ANXA6,GM2A,TNIP1	Karitiana(10)
5	156556482	156753795	ITK	Karitiana(17)
5	169059675	169261942	DOCK2	Orcadian(15),Karitiana(25)
5	173075188	173213340		Han(10),Pima(9),Karitiana(15)
5	177824095	178207819	ZNF354A,CLK4,COL23A1	Pathan(21)
6	2463735	2688673		Daur(25)
6	4828582	5102470	CDYL	Yakut(9)
6	5331085	5671230	FARS2	Karitiana(19)
6	12903017	13060026	PHACTR1	Brahui(24)
6	14121739	14431340	CD83	Karitiana(14)
6	18152751	18470956	NHLRC1,TPMT,AOF1,DEK	Yakut(21)
6	19470037	19657565		Xibo(23)
6	22599976	22954031		Burusho(19)
6	25282127	25521901		Mandenka(24)
6	29361735	29569709	OR10C1,OR12D3,OR2H1,OR5V1,OR11A1,MAS1L, OR12D2	Biakapygmy(12),Palestinian(14),Burusho(11), Nasioi(25)
6	29639232	30174337	HLA-F,PPP1R11,OR2H2,HLA-A,RNF39, HLA-A29.1,GABBR1,HLA-G,ZNRD1	Makrani(22),Yizu(5),Miaozu(17)
6	32255674	32523953	AGER,NOTCH4,PBX2,RNF5, HLA-DRA,BTNL2,GPSM3	Mandenka(1)
6	32689867	32871866	HLA-DQA1,HLA-DQB1,HLA-DQA2	Mandenka(12)
6	33148813	33266876	HLA-DPA1,COL11A2,HLA-DPB1	Yoruba(17)
6	33650456	33903106	IHPK3,ITPR3,BAK1,MLN,LEMD2	Dai(24)
6	44633967	45050278	SUPT3H	Mandenka(9),Han(20),Dai(12),Lahu(10),Nasioi(12)
6	45555912	45795311	RUNX2	Makrani(3)
6	47209531	47437114	TNFRSF21	Dai(21)
6	47790908	47917424	GPR115,OPN5	Yakut(25)
6	48429783	48956973		Maya(22)
6	49593225	49945499	CRISP1,RHAG,CRISP3,CRISP2,PGK2	Maya(25)
6	53622021	54001405	LRRC1,KLHL31	Mbutipygmy(21)
6	54736155	54969606		Mbutipygmy(22)
6	56311697	56590760	DST	Kalash(4),Tu(9),Maya(17)
6	57218013	57357936		Kalash(9)
6	69387864	69809791	BAI3	Palestinian(18)
6	72502632	72741721	RIMS1	Mongola(8)
6	76686994	76810032	IMPG1	Nasioi(4),Colombian(19)
6	84164784	84290550	PRSS35,ME1	Pathan(4)
6	89689765	89830318	RNGTT	Yizu(9)
6	89933835	90083513	GABRR1,GABRR2	Japanese(13),Yizu(2)
6	95060165	95228507		Yoruba(6)
6	97269908	97606504	KLHL32,GPR63	Bantu(6)
6	98211669	98448913		Sardinian(23)
6	105651496	106152366	PREP,POPDC3,BVES	Palestinian(24),Bergamo(7),Kalash(11),Burusho(18), Pathan(10),Hazara(6),Mongola(23),Tu(20),Xibo(5), Daur(3),Han(24),She(12),Lahu(19),Cambodian(19), Papuan(21)
6	107952171	108581628	SEC63,OSTM1	Mbutipygmy(8),Mozabite(13),Palestinian(21)
6	109124015	109507738	SESN1,ARMC2	Mbutipygmy(4),Papuan(22)
6	109610493	109818534	CD164,PPIL6	Mbutipygmy(25)
6	110099577	110506756	GPR6	Mbutipygmy(16),Bergamo(11)
6	118632392	118800195	SLC35F1	Pathan(13)
6	119082975	119187072		Pathan(1)
6	124433813	124879789	NKAIN2	Makrani(8)
6	125353171	125941175	HDDC2,RNF217,TPD52L1	Kalash(10),Hazara(12),Yakut(11),Oroqen(10),She(14), Dai(5)
6	126070736	126316966	HEY2,NCOA7	Kalash(22)
6	129265160	129593742	LAMA2	Uygur(21)
6	131152063	131478939	EPB41L2	Mandenka(19)
6	133651991	134010986	EYA4	Mbutipygmy(6)
6	143879416	144096465		French(14)
6	148693192	149638439	SASH1,UST	Biakapygmy(16)
6	150648034	151372379	IYD,PLEKHG1	Biakapygmy(7)
6	159029826	159263598	SYTL3,EZR	Daur(13)
6	162656326	163211290	PARK2	Bantu(19),Naxi(6)
6	163466489	163693383		Surui(24)
7	3814905	4288097	SDK1	Tujia(24)
7	6011917	6484225	DAGLB,PSCD3,RAC1,EIF2AK1,KDELR2,JTV1, PMS2	Mbutipygmy(23)
7	12044688	12488684	TMEM106B	Uygur(15)
7	12930194	13070161		Maya(13)
7	13184576	13289846		Naxi(24)
7	15025797	15748618	MEOX2	Bergamo(4),Yakut(20),Yizu(25),Tujia(13),Dai(13)
7	16010825	16366347	LOC729920	Druze(15),Makrani(12)
7	19340895	19594375		Colombian(17)
7	26578494	26790488	SKAP2	Brahui(13)
7	27523114	27729101	HIBADH	Bantu(3)
7	27845998	28005266	JAZF1	Balochi(10),Cambodian(21)
7	53602426	53832207		Sardinian(4)
7	75009358	75132211	HIP1	Bergamo(9),Burusho(3),She(2)
7	77474529	77608457	MAGI2	Surui(11)
7	79159688	79734155	GNAI1	Yoruba(24)
7	85874226	87059152	ABCB1,CROT,ABCB4,C7orf23,GRM3	Makrani(9),Balochi(18),Brahui(19),Uygur(20),She(19), Papuan(19)
7	89170527	89464758		Russian(17)
7	94741356	94916886	PON3,PPP1R9A,PON1,PON2	Oroqen(14)
7	100371758	100589036	SERPINE1,TRIM56,AP1S1	Tuscan(24)
7	102802913	102979768	SLC26A5	Mbutipygmy(15),Adygei(4)
7	106367317	106507403	PRKAR2B	San(6)
7	108036770	109004591		Sardinian(17),Orcadian(24),Russian(18),Pathan(14), Uygur(25)
7	110096779	110636346	LRRN3,IMMP2L	Adygei(9)
7	111874269	112610813	GPR85,TMEM168,IFRD1,C7orf53	Tu(10),Daur(10),Japanese(14),Naxi(4),She(23), Miaozu(13),Miaozu(25),Lahu(21),Cambodian(11)
7	112731498	113451566		Naxi(8)
7	117369189	118769127	LSM8,ANKRD7	Brahui(11),Burusho(4)
7	117993102	118769127		Druze(14),Tuscan(19),Brahui(9)
7	118872474	120189033	KCND2	Druze(13),Brahui(23),Burusho(6),Pathan(15)
7	126646298	127144880	SND1,GCC1,FSCN3,GRM8,ARF5,ZNF800,PAX4	Tujia(4),Miaozu(10)
7	127411593	127750430	SND1,RBM28,LRRC4,LEP	Mongola(12),Tujia(5)
7	130043317	130417656	KLF14	Orcadian(11)
7	132787459	133091326	EXOC4	Yoruba(5)
7	141932985	142367897	TRPV5,TRPV6,PRSS2,PRSS1,KEL,EPHB6	Tujia(23)
7	142727050	142923473	TAS2R41,ZYX,TAS2R60,EPHA1,CLCN1	Kalash(3)
7	145674109	145912345	CNTNAP2	Kalash(13)
7	152299155	153005921		Biakapygmy(20)
8	416479	645056		Yoruba(21)
8	6376528	6891919	DEFB1,LOC728358,AGPAT5,MCPH1,DEFA3, ANGPT2,DEFA6,DEFA4	Papuan(10)
8	8157397	8274496	PRAGMIN	Yizu(16)
8	10917927	11893992	XKR6,DEFB136,BLK,DEFB137,MTMR9,GATA4, FDFT1,CTSB,DEFB134,AMAC1L2,NEIL2	Bergamo(15),Brahui(4),Uygur(17),Xibo(13),Oroqen(6), Daur(9),Tujia(22),Miaozu(5),Dai(7),Lahu(13), Nasioi(3),Papuan(3),Maya(2),Colombian(6)
8	11512635	11893992	DEFB137,CTSB,FDFT1,GATA4,DEFB134,NEIL2, DEFB136	Adygei(5),Mongola(3),Tu(1),Brahui(1),Pathan(2)
8	13047702	13586455	DLC1	Mozabite(25)
8	14853084	16121836	TUSC3,SGCZ,MSR1	Bedouin(13),Basque(16),Tuscan(23),Russian(14), Burusho(25),Tu(25),Oroqen(25),Miaozu(12), Nasioi(8),Papuan(24),Papuan(25), Maya(12),Karitiana(18)
8	15832852	15988678		Druze(22)
8	16212761	16666722		Mozabite(24),Tuscan(17),Orcadian(25),Russian(20)
8	17501697	17958397	PCM1,MTUS1,ASAH1,FGL1,PDGFRL	Mozabite(18),Sardinian(18)
8	20524255	20924752		Yakut(18)
8	47624389	48066866		Balochi(16),Hazara(14)
8	53063166	53277122	ST18	Adygei(22),Balochi(8)
8	53486339	53659338		Daur(23)
8	54561682	54709984		Adygei(25)
8	64336582	64781861		Papuan(16)
8	67269712	67595838	RRS1	Kalash(12),Dai(1),Cambodian(12),Karitiana(5)
8	68519638	68825216	CPA6	Mozabite(10),Kalash(5),Hazara(21),Cambodian(17)
8	71498430	71601874		Han(2)
8	75215195	75433821	JPH1	Bantu(13)
8	76461693	76686918	HNF4G	Yizu(8)
8	84137265	84961821		Druze(21),Balochi(12),Pathan(19)
8	85074219	85339538	RALYL	Druze(2)
8	85820882	86059755	RALYL	Makrani(11),Balochi(6),Uygur(12),Japanese(21)
8	87029998	87310831	PSKH2,ATP6V0D2	Druze(19),Balochi(14),Nasioi(18)
8	92933248	93034585		Mandenka(21)
8	94942051	95075275	PPM2C	Nasioi(14)
8	98399910	98525460		Burusho(20)
8	99367051	99497675	NPAL2	Papuan(4)
8	102663785	103035324	NCALD,GRHL2	Sindhi(15)
8	106945510	107599595		Balochi(25),Yakut(17),Naxi(17)
8	107892324	108155638		Lahu(22)
8	114819912	115097529		Maya(16)
8	118304453	118409183		Surui(16)
8	129493769	129637243		French(25)
8	134994907	135284280		Miaozu(23)
8	138893837	139276913		Biakapygmy(13)
8	139668946	139855420		Tuscan(18)
9	199403	386380	DOCK8	Tu(14),Yizu(19),Tujia(25),Nasioi(21),Papuan(8)
9	2285086	2588844		She(11)
9	4823437	4962398	RCL1	She(13)
9	5171467	5449103	RLN1,C9orf46,INSL4,CD274,RLN2,INSL6	Biakapygmy(10)
9	8700180	8867467	PTPRD	Biakapygmy(18)
9	12089118	12768224	TYRP1	Mozabite(12),Sardinian(25),Bergamo(13),Russian(10),Mongola(20),Maya(14),Pima(18)
9	16374212	16776930	BNC2	Bergamo(14)
9	36871866	37026247	PAX5	Balochi(4)
9	38623652	38761831		Bedouin(1),Druze(1),Adygei(1),Basque(1),Xibo(1), Daur(1),Lahu(1),Pima(1)
9	70225758	70552216	PIP5K1B,C9orf71,PGM5	Biakapygmy(1),Druze(3),Orcadian(1),Oroqen(5), Tujia(2),Lahu(5),Pima(10)
9	74082844	74905562	ZFAND5,ALDH1A1,TMC1	Sardinian(16),Daur(16)
9	77178589	77543896		Surui(8)
9	77676024	77999642	PCSK5	Surui(22)
9	79336975	79454404	GNA14	Basque(12)
9	85960430	86125249		Mandenka(17)
9	93547935	93691236	ROR2	Bergamo(24)
9	97432161	97617869		Mbutipygmy(7)
9	103800303	104112737		Uygur(16),She(3),Miaozu(2)
9	112395540	112559724	MUSK	Yoruba(2)
9	113656794	113772206	UGCG	Colombian(23)
9	122643290	122990808	TRAF1,PSMD5,RAB14,C5	Bedouin(20),Burusho(15)
9	132647102	132773387	ABL1,FIBCD1,QRFP	Tu(22),Maya(11)
9	135459143	135582163	DBH,SARDH	Maya(4)
10	2736375	2982761		Han(22)
10	10967550	11340442	CUGBP2	Tuscan(13),Yakut(13),Mongola(18),Tu(8),Oroqen(23), Hezhen(18),Daur(4),Tujia(19),Dai(8)
10	22757785	23372952	PIP4K2A	Tuscan(6),Basque(25),Pathan(3),Sindhi(12), Cambodian(24)
10	24043573	24306494		Pathan(12)
10	25634799	25966565	GPR158	Orcadian(16)
10	29825460	30327404	SVIL	Mozabite(21)
10	35917492	36048499	FZD8,GJD4	Tuscan(10)
10	42221594	42593362	ZNF33B	Yoruba(4)
10	44700478	45344626	OR13A1,MARCH8,C10orf25,C10orf10,ALOX5, RASSF4,ZNF22	Mbutipygmy(11),Daur(6),Cambodian(4),Colombian(21)
10	49115546	49477637	ARHGAP22,FRMPD2,MAPK8	Maya(5)
10	57080980	57556524		Brahui(17)
10	58167016	59096648		Naxi(9)
10	59245691	59577503		Sindhi(23),Naxi(16)
10	65232542	65594256		Druze(23),Adygei(24),Orcadian(13),Balochi(22), Burusho(8),Uygur(13),Tu(17),Han(11)
10	66389099	66761086		French(6)
10	67453528	67735757	CTNNA3	Makrani(15)
10	69579519	69755535	MYPN,PBLD,ATOH7	French(20)
10	73380802	73716376	CHST3,SPOCK2,DDIT4	Druze(18),Burusho(14),Papuan(2)
10	77819049	77991046	C10orf11	Brahui(22),Xibo(20)
10	80764296	80902453	ZCCHC24,PPIF	Bergamo(3)
10	81674324	81904767	SFTPD,C10orf57	Sardinian(1),Orcadian(8),Balochi(3)
10	86704718	86954099		Bantu(14)
10	88330451	88433282	LDB3,OPN4	Mbutipygmy(17)
10	89771870	90037689	C10orf59	Surui(18)
10	90416592	91056749	ACTA2,STAMBPL1,LIPN,LIPK,CH25H,FAS,LIPA, IFIT2,LIPF,LIPM	Surui(15)
10	91576473	91734878		Surui(12)
10	93293466	93440487	PPP1R3C	Naxi(3),Cambodian(7)
10	96769856	97194433	CYP2C8,PDLIM1	Cambodian(9)
10	100422089	100756393	HPSE2	Bantu(4)
10	101119286	101355292	NKX2-3,GOT1	San(15)
10	109084087	109205297		Yoruba(10)
10	114824488	115772367	HABP2,NRAP,NHLRC2,DCLRE1A,CASP7	Maya(6),Surui(6)
10	117479268	117630306		Russian(24)
10	121695771	121871671		Daur(12)
10	126163546	126286373	LHPP	Colombian(10)
10	129081427	129404533	DOCK1,NPS	Pima(5)
11	7575838	7705050	CYB5R2,OVCH2,PPFIBP2	Russian(12)
11	20339900	20606738	PRMT3,HTATIP2,SLC6A5	Mbutipygmy(13)
11	27170130	27373423	LGR4	Yakut(24)
11	28505842	28919457		Burusho(24),Papuan(7)
11	29072263	29469823		Papuan(5)
11	31825916	32043684		Papuan(17)
11	40952636	41087405		Hazara(19)
11	45363316	46266544	CHST1,PHF21A,CRY2,GYLTL1B,PEX16,MAPK8IP1	Yakut(10),Tu(24),Xibo(16),Nasioi(20)
11	48044041	48250507	PTPRJ,OR4X2,OR4B1,OR4X1	Russian(22)
11	55226579	56066044	OR8K1,OR8K5,OR5D16,OR5R1,OR8H3,OR5D13, OR5M8,OR8H1,OR5W2,OR8J3,OR5L1,OR5M9, OR5T2,OR5F1,OR5AS1,OR8J1,OR8I2,OR5T3, OR5J2,OR8H2,OR5D14,OR10AG1,OR8U8,OR8K3, OR5D18,OR5T1,OR5L2,OR5I1	Mandenka(18)
11	60479783	60699292	CD6,VPS37C,CD5	Miaozu(18),Dai(9)
11	67045170	67258202	GSTP1,ACY3,NUDT8,ALDH3B2,TBX10,NDUFV1, CABP2	Burusho(21),Nasioi(6)
11	71927252	72131386	CENTD2,PDE2A	Pima(23)
11	77934646	78302795	NARS2,ODZ4	Lahu(4)
11	80820326	81836556		Daur(19)
11	84433373	84757067		Bantu(15)
11	87110321	87244037		Sindhi(3)
11	89525014	89874972	NAALAD2	Mozabite(16)
11	90001747	90195012		Mozabite(3)
11	98525104	98710223	CNTN5	San(13)
11	98896380	99119111	CNTN5	Mandenka(6)
11	109802258	110209636	FDX1,ARHGAP20	Yoruba(13)
11	110450906	110612201		Bantu(2)
11	116901715	117068505	DSCAML1	Mbutipygmy(14)
11	117458898	117655337	MPZL2,SCN2B,MPZL3,AMICA1,TMPRSS4,SCN4B	Orcadian(5)
12	1077793	1481124	ERC1	Balochi(24),Japanese(15)
12	2578082	2756560	CACNA1C	French(17),Maya(24)
12	9178429	9415008		Burusho(5),Maya(3),Colombian(25)
12	18895682	19330347	PLEKHA5	Mandenka(11),French(22)
12	23067472	23171306		Colombian(3)
12	26189099	26763997	SSPN,ITPR2	Maya(9)
12	29511714	29713647	TMTC1,OVCH1	Colombian(1)
12	37719039	37938160		Orcadian(23)
12	38644957	39123531	LRRK2,SLC2A13	She(21)
12	39239201	39980641	CNTN1	Xibo(17),Naxi(11),Tujia(16),She(15),Miaozu(6),Dai(15)
12	42450956	43291063	TMEM117,NELL2,IRAK4	Cambodian(18)
12	55503625	55617354		Oroqen(20)
12	58577210	58882884		San(24)
12	68505675	68755087		Sardinian(10),Burusho(22)
12	69079044	69432872	KCNMB4,PTPRB	Surui(23)
12	73103596	73460729		Russian(15),Xibo(18)
12	73671364	73981709	KCNC2,CAPS2	Basque(20)
12	75061905	75199519		Makrani(19),Oroqen(16),Japanese(7),Nasioi(7)
12	98567502	98987844		Mongola(6),Oroqen(9),Han(7)
12	122664565	122942000	ATP6V0A2,GTF2H3,EIF2B1,DDX55,TCTN2	Xibo(22)
12	125462571	125635012		Uygur(24)
13	18516304	18649932	TUBA3C	Russian(25),Sindhi(25),Mongola(21)
13	20702021	20830963		Hezhen(10)
13	32278970	32451783		Bergamo(21),French(13),Kalash(16),Lahu(14)
13	32993384	33632408	RFC3	Mozabite(23),Bedouin(9),Adygei(8),Bergamo(19), Makrani(17),Balochi(7),Burusho(16)
13	34836773	35142301	MAB21L1	Mozabite(19),Bedouin(15),Adygei(14)
13	36963446	37093296	POSTN	Druze(17)
13	37647934	38226541	FREM2,UFM1	Sardinian(21)
13	42008367	42201691	TNFSF11	Bedouin(24)
13	42871715	43137768	ENOX1	Pathan(25)
13	51286766	51429364	CCDC70,ATP7B	Bedouin(4),Sardinian(2),Bergamo(16),Basque(3)
13	52164298	52530146	LECT1,OLFM4,PCDH8	Mbutipygmy(5),Karitiana(4)
13	52377114	52532090	OLFM4	Miaozu(15)
13	54504191	55223292		Yoruba(11)
13	57503484	57724855		Basque(11)
13	59105347	59268311	DIAPH3	She(25)
13	61708066	62308067		Xibo(25),Hezhen(22)
13	62730395	63177133		Mongola(14),Yizu(20),Lahu(20)
13	68116834	68286777		Basque(24)
13	73537800	74222764	KLF12	Tu(21),Hezhen(19),Yizu(21),She(18)
13	79494058	79599077		Kalash(17)
13	82846048	83188717		Bergamo(12)
13	84704591	84936916		She(10)
13	95508539	95923396	HS6ST3	Russian(19)
13	98096500	98348352	DOCK9,SLC15A1	San(2)
13	103395052	103616267		Adygei(21)
14	21610046	22103069		San(11)
14	31053122	31478554	NUBPL	Bantu(22)
14	32893161	33094981	NPAS3	Biakapygmy(8)
14	35498030	35612344		Orcadian(18)
14	41789491	42393956		San(10)
14	47521656	47917993		Mandenka(5)
14	47999211	48268645		Yoruba(15)
14	49473932	49590874		Uygur(6),Tujia(9)
14	55848697	56246923		San(8)
14	58872188	59302323	DAAM1,RTN1,GPR135,C14orf149	Hazara(16)
14	60762952	61203509	PRKCH,TMEM30B	Palestinian(19),Sardinian(22),French(15),Orcadian(14),Russian(16),Uygur(10),Pima(21)
14	61794590	62569088	KCNH5	Makrani(16),Sindhi(17)
14	62711170	63099534	RHOJ,PPP2R5E	Bedouin(18),Adygei(23),French(18),Makrani(5), Pathan(8),Daur(15)
14	63401176	63635335	SYNE2	Pathan(17)
14	65424230	65959422		Druze(9),Adygei(10),Sardinian(7),French(1),Kalash(19),Sindhi(19),Hazara(3),Yizu(17)
14	66960075	67060401	C14orf83	Adygei(17)
14	69399306	69611855	SLC8A3,SMOC1	Xibo(14)
14	75437072	75660959	TGFB3,TTLL5	Bedouin(7)
14	81112534	81359690		Surui(17)
14	91362522	92202691	CPSF2,TC2N,NDUFB1,SLC24A4,RIN3,FBLN5	Biakapygmy(6)
14	93267881	93489863	PRIMA1,ASB2	Karitiana(23)
14	95481271	95726440		San(4)
14	96269584	96605676	VRK1	Mandenka(10)
14	99085798	99455094	CYP46A1,EML1,HHIPL1	Biakapygmy(14)
14	100865108	101109702	DIO3	Pima(3),Surui(19)
14	103633685	103876577	KIF26A	Surui(13)
15	25855901	26012308	OCA2	Dai(25)
15	28864774	29252655	MTMR10,MTMR15	Biakapygmy(9),Oroqen(8),Yizu(1),Miaozu(16),Dai(20), Cambodian(10)
15	33122971	33338087		Kalash(25)
15	50772572	51038175	ONECUT1	Lahu(7)
15	52486489	52947687	UNC13C	Sindhi(6),Pima(6)
15	54574406	55385809	TCF12,ZNF280D	San(18),Adygei(7),Tuscan(1),Kalash(1),Mongola(7), Cambodian(8)
15	56617186	56829655	ADAM10,LIPC	Makrani(2)
15	59541650	59910090		Cambodian(15)
15	61103265	61210792	LACTB,TPM1	Orcadian(19)
15	61436547	62126992	USP3,CA12,DAPK2,FBXL22	Pathan(24),Hazara(10),Uygur(8),Yakut(3),Mongola(10),Tu(5),Xibo(7),Oroqen(22),Hezhen(5),Daur(7),Yizu(13), Yizu(12),Naxi(12),Naxi(7),Tujia(20),Tujia(14), Han(12),She(8),Miaozu(19),Miaozu(7),Dai(19),Lahu(17),Cambodian(6)
15	62071285	62735847	KIAA0101,DAPK2,PPIB,SNX22,CSNK1G1,ZNF609, SNX1,TRIP4	Mbutipygmy(2)
15	62891879	63142521	ANKDD1A,PIF1,MTFMT,SPG21	San(22)
15	64238419	64347125	MEGF11	Mozabite(1)
15	64879384	65022836		Sindhi(14)
15	66397438	66560328	ITGA11	Surui(1)
15	67115280	67736570	RPLP1,GLCE,KIF23,NOX5,PAQR5	Bedouin(10),Sardinian(6),Bergamo(5),Basque(2)
15	67558955	67729382		Tuscan(21)
15	67842115	67959102		Surui(20)
15	69477848	69932782	MYO9A,THSD4	Adygei(2),Surui(14)
15	71790812	72030299	TBC1D21,LOXL1,CD276	Palestinian(4),Karitiana(21)
15	74259512	75071032	SCAPER,ETFA,RCN2,C15orf27,ISL2	San(25)
15	75619817	75770857		Kalash(20),Han(16)
15	91377986	91599736		Surui(9)
16	14278552	14378762		Biakapygmy(2)
16	15438209	15913069	C16orf45,MYH11,KIAA0430	Biakapygmy(3)
16	15989629	16186364	ABCC6,ABCC1	Lahu(12)
16	16818322	16974784		Lahu(2)
16	17094003	18064361	XYLT1	Yakut(19),She(24),Lahu(3)
16	17898116	18050803		She(5)
16	31250506	31435321	C16orf58,ARMC5,COX6A2,ITGAD,ITGAM,SLC5A2, ITGAX,TGFB1I1	Yakut(6),Colombian(7)
16	53769051	54133662	MMP2,IRX6	Hezhen(9)
16	56166501	56558215	GPR97,KIFC3,CNGB1,GPR56,GPR114,KATNB1, CCDC135	Karitiana(12)
16	64119858	64462488		Tu(13),Xibo(15),Hezhen(8),Daur(22)
16	66384748	67093606	NFATC3,SLC12A4,EDC4,PRMT7,NUTF2,THAP11, LCAT,CTRL,DPEP2,RBM35B,PSKH1,PSMB10, DPEP3,LYPLA3,SMPD3,CENPT,DDX28,DUS2L	Mandenka(13),Uygur(7)
16	77673462	78166002	WWOX	San(12)
17	22591207	22980475	KSR1,WSB1	Miaozu(14)
17	24346567	24627212	TIAF1,CRYBA1,MYO18A,NUFIP2,PIPOX	Dai(16)
17	28515620	28891980	ACCN1	Mozabite(11)
17	32055719	32355639		Karitiana(2)
17	33106683	33256513	HNF1B	Karitiana(1)
17	48466509	49226648		Basque(22)
17	49452410	50166885		Bantu(16)
17	51173101	51534381	PCTP	Tuscan(4)
17	55857642	56774017	PPM1D,APPBP2,BCAS3	Adygei(12),French(2),Russian(3),Makrani(1),Balochi(2),Brahui(3),Hazara(23),Uygur(4),Yakut(4),Tu(2),Xibo(12),Oroqen(2),Daur(11),Japanese(2),Yizu(3),Naxi(22), Lahu(6),Cambodian(14),Maya(18)
17	59717248	59833749	PECAM1	Palestinian(23)
17	69202771	69360577		Karitiana(16)
17	73112277	73370301		Karitiana(8)
17	73644287	73838135	TK1,AFMID,TMC8,SYNGR2,BIRC5	Karitiana(9)
17	73966813	74145560		Karitiana(3)
17	74648192	74970445	HRNBP3	Karitiana(22)
18	2062156	2316914		Biakapygmy(19)
18	2844002	3043491	LPIN2	Biakapygmy(25)
18	19836827	20043345	OSBPL1A,CABYR	French(11)
18	21636779	21828290		Sardinian(13),Sindhi(16),Tu(3),Maya(21),Pima(4), Colombian(18)
18	24373763	25381767		San(16)
18	26174242	26431023		Pima(22)
18	27311913	27599486	DSG2,MCART2,B4GALT6,TTR,DSG3	Pima(14)
18	32428956	32599682	FHOD3	Palestinian(2),Bergamo(6)
18	35065364	35343613		Mozabite(20)
18	36569197	36784354		Palestinian(3)
18	37214274	37418483		Russian(13),Japanese(24)
18	38889413	39246953	SYT4,RIT2	Bantu(7)
18	44090092	44449455	KIAA0427	Mandenka(4)
18	47427706	47723465		Bantu(10)
18	50934136	51326964	TCF4	Palestinian(13),Sindhi(21)
18	61828996	62160305		Bantu(1)
19	15642037	15823509	OR10H2,OR10H3,OR10H5,CYP4F12,OR10H1	Bantu(24)
19	23101703	23567873	ZNF91	Japanese(25)
19	42985327	43244674	SIPA1L3	Bantu(11),Colombian(9)
19	46642137	46931018	CEACAM7,CEACAM21,CEACAM5	Dai(22)
19	49128573	49306048	ZNF222,ZNF284,ZNF224,ZNF223,ZNF230	Brahui(18)
20	4233796	4352694		Colombian(5)
20	6962445	7233837		Bantu(12)
20	9226451	9564075	PAK7,C20orf103,PLCB4	Mozabite(8),Palestinian(5),Orcadian(9)
20	15668528	15846812		Bergamo(20)
20	20912485	21028359		Palestinian(9)
20	22143065	22281108		Balochi(1)
20	31051687	31204465	BPIL3,SPAG4L,C20orf185,BPIL1,C20orf186	Yakut(5),Mongola(4),Oroqen(4),Japanese(6),Naxi(2), Tujia(12),She(7),Cambodian(5)
20	33029326	33335075	MYH7B,EIF6,TRPC4AP,EDEM2,MMP24,PROCR	Miaozu(24)
20	43116486	43405284	PI3,STK4,SEMG2,SLPI,SEMG1,WFDC12,RBPJL, SDC4,KCNS1	Mbutipygmy(18),Yoruba(22)
20	52858624	53307708		Makrani(23)
20	54179960	54410819	AURKA,C20orf108,CSTF1,MC3R	Makrani(20)
20	58223398	58498865		Lahu(18)
20	58761316	59550179	CDH4	Karitiana(20)
21	14771745	14892587	SAMSN1	Colombian(12)
21	15770435	16001217		Palestinian(7),Tu(7),Xibo(11),She(20),Miaozu(9)
21	16231805	16335050		Orcadian(22),Japanese(10)
21	16458054	16749660		Japanese(5)
21	17553470	17747071		Orcadian(3),Papuan(1)
21	28943581	29166731	N6AMT1	Mandenka(3),Palestinian(12),Russian(9),Sindhi(13)
21	39211324	39368554		Pima(20)
21	39664786	39882854	WRB	Yoruba(20)
22	8109126	8728797		Biakapygmy(24)
22	20611093	20769298	PPM1F,TOP3B	Druze(6),Hazara(20),Hezhen(2)
22	34294104	34459797	APOL6,APOL5,MB	Mandenka(2)
22	34672336	35283761	APOL2,EIF3D,MYH9,RBM9,TXN2,APOL1	Mandenka(15),Xibo(19)
22	35645892	35869074	KCTD17,IL2RB,CSF2RB,TST,TMPRSS6,MPST	Mandenka(22)
22	37959275	38401693	PDGFB,MAP3K7IP1,SYNGR1,CACNA1I,ATF4, RPS19BP1,RPL3,MGAT3,SMCR7L	Tu(15)
22	40456765	41203476	SEPT3,MEI1,WBP2NL,SREBF2,TNFRSF13C, TCF20,CCDC134,NAGA,NFAM1,CYP2D6,CENPM	She(9),Dai(4),Papuan(6)
22	42029718	42199551	SCUBE1	Bergamo(22)
22	44350544	44635144	ATXN10	Nasioi(23)
22	44842095	45220462	PKDREJ,PPARA,GTSE1,TRMU,CELSR1	Nasioi(16)
22	45952752	46816389		Biakapygmy(15)
