# Supplementary material for: Genetic Variation and Recent Positive Selection in Worldwide Human Populations: Evidence from Nearly 1 Million SNPs
Source: PLoS One. 2009 Nov 18;4(11):e7888. doi: 10.1371/journal.pone.0007888 (PMC2775638; doi:10.1371/journal.pone.0007888)
Supplement: Table S3 — List of the candidate regions for recent positive selection identified in the regional-level analyses, including the chromosome, start and end positions, HGNC gene ID, and regions (and signal rank) for which a positive signal was obtained. (0.07 MB XLS) [file pone.0007888.s013.xls]

## Sheet: tab1
Table S3.
Chromosome	Start	End	HGNC gene ID	Region ID(rank)
1	35401376	35467861	SFPQ	Csasia(26),Mideast(3),Europe(7)
1	35609027	36415445	PSMB2,ZMYM4,TRAPPC3,TFAP2E,COL8A2, EIF2C3,ADPRHL2,EIF2C4,TEKT2,EIF2C1	Csasia(53),Mideast(42),Mideast(19),Europe(58),Europe(49)
1	49046634	49194681	AGBL4	Csasia(90)
1	50530472	50710436	FAF1	Easia(95)
1	53306836	53364051	PODN,SLC1A7	America(70)
1	72736905	73108695		Csasia(72),Easia(82)
1	75473747	75740366	SLC44A5	Easia(47)
1	75848978	76016970	SLC44A5,ACADM	Easia(69)
1	76170837	76384590	ST6GALNAC3	Easia(38)
1	93240650	93295860		Csasia(63),Easia(48)
1	94231009	94363527	ABCA4	Mideast(17)
1	103096206	103527421	COL11A1	Oceania(8),Mideast(23),Europe(61),America(18),Easia(13), Csasia(52)
1	105444626	105505574		Mideast(26)
1	115401947	115679045	TSPAN2,NGF	America(99)
1	144970707	145023445		Oceania(16)
1	153069016	153147010	KCNN3	Easia(1)
1	153258013	153361782	EFNA3,DCST1,ADAM15,DCST2,EFNA4	Easia(86)
1	165343158	165426232	DUSP27	Oceania(71),America(11)
1	174691882	174826002	PAPPA2	Oceania(87)
1	178370474	178510147	QSOX1,LHX4	Europe(85)
1	183043800	183219736	FAM129A	Oceania(31)
1	183631346	183689227		Oceania(93)
1	187245123	187352431		Csasia(59)
1	187787128	188034003		Csasia(25)
1	192271529	192388166		Mideast(28)
1	195509495	195631728	CRB1	America(6),Easia(11)
1	234828878	234993290	ACTN2,HEATR1	Europe(71)
1	236528715	236602153		Oceania(92)
1	243991487	244431215		Mideast(12),Europe(6),Oceania(88)
1	246346107	246495261	OR2M4,OR2M2,OR2M3,OR2M5	Csasia(15),Mideast(6)
1	247040508	247137334	ZNF692,ZNF672	Europe(99)
2	2752171	2946255		Oceania(84)
2	3060492	3114172		Oceania(98)
2	9145966	9471706	ITGB1BP1,DDEF2	Easia(81)
2	13520867	13603353		Europe(57)
2	17002770	17500297		Easia(44)
2	17629623	17981411	SMC6,KCNS3,GEN1,VSNL1	Oceania(19),America(7),Easia(8)
2	23558894	23718681		Oceania(33)
2	26394662	26597941	OTOF,GPR113	America(40)
2	29266798	29387240	ALK	Easia(66)
2	36848703	36903067	VIT	Mideast(18)
2	39604533	39803986	TMEM178	Csasia(86),Oceania(36)
2	42155604	42330538	EML4	America(64)
2	51863040	51937093		America(44)
2	62603724	62669234		Oceania(54)
2	69612919	69685236	AAK1	Mideast(51)
2	72159315	72356501	EXOC6B,CYP26B1	Csasia(5),Mideast(14),Europe(84),Easia(9)
2	80596881	80662917	CTNNA2	America(59)
2	88148061	88205181	FABP1,SMYD1	Oceania(5),Easia(60)
2	96848541	96990987	CNNM3,ANKRD23,SEMA4C	Csasia(35),America(97)
2	108221600	108337500	SULT1C3,SULT1C2	America(12),Easia(5)
2	108858887	109048773	EDAR	Csasia(62),America(36),Easia(21)
2	111313762	111436354	ACOXL	Oceania(37)
2	114188252	114328330	SLC35F5	Mideast(96)
2	114451886	114517132		Mideast(84)
2	116139694	116251392	DPP10	Mideast(35)
2	122279249	122338986		America(9),Easia(25)
2	123104889	123207379		Europe(34)
2	125685770	126185176		Oceania(48),Easia(46)
2	140284350	140373840		America(56)
2	151599639	151918988	RBM43,NMI	America(83)
2	152424874	152708583	CACNB4,STAM2	Csasia(11),Oceania(82),Mideast(30),Europe(76),America(94)
2	152927424	152982132		Csasia(76)
2	154079444	154141922		America(75)
2	159217221	159382330	PKP4	America(14),Easia(79)
2	161133903	161312401		America(73)
2	161428018	161652520		America(13)
2	165273589	165611995		Oceania(78)
2	165726600	166234496	SCN2A	Oceania(6)
2	172082641	172226959	CYBRD1	Easia(83)
2	175905088	176041595		Europe(94)
2	177093417	177641359		Easia(24)
2	178152100	178404256	PDE11A	Oceania(70),Europe(24),America(38)
2	179361047	179452168	CCDC141	Oceania(52)
2	184679814	184761027		Mideast(85)
2	190063600	190200259	SLC40A1	Easia(96)
2	190652296	190729142		America(16)
2	196964514	197112959	HECW2	Csasia(2),Easia(12)
2	197532061	197597370		Csasia(75)
2	197739165	197913105		Csasia(83),Europe(92)
2	212725707	213305104	ERBB4	Oceania(96),Mideast(56)
2	218775225	218980538	SLC11A1,PNKD,AAMP,TMBIM1,ARPC2,CTDSP1	Csasia(34)
2	232448114	232520961	NPPC	Oceania(74)
2	238021534	238234024	MLPH,RAB17,PRLH	Mideast(74)
3	5690540	5771218		Mideast(24)
3	7658434	7709428	GRM7	Easia(32)
3	25794632	26252638	OXSM,NGLY1	Csasia(69),Mideast(25),Europe(73),Easia(53)
3	27001007	27124086		Easia(56)
3	31300573	31516873		Mideast(80)
3	31700695	31826730	OSBPL10	America(54)
3	35614888	35761535	ARPP-21	Mideast(59)
3	38323747	38399189	SLC22A14	Oceania(25)
3	44115588	44383401	C3orf23	Easia(14)
3	45049786	45112091	CDCP1,CLEC3B	Easia(28)
3	59663198	59747382	FHIT	Mideast(78)
3	62631299	62789568	CADPS	Easia(90)
3	66400004	66601516	LRIG1	Csasia(68),Mideast(71)
3	68867968	69117075	C3orf64,FAM19A4	Oceania(75)
3	71235800	71563256	FOXP1	Oceania(61)
3	80322340	80374731		America(31)
3	81888207	82097118	GBE1	Csasia(70)
3	88434658	88619433		America(69)
3	88936044	89158576		America(26)
3	98258211	98368882	EPHA6	Mideast(87)
3	111438869	111566993		Mideast(73),Europe(45)
3	127226361	127410266	SLC41A3,ALDH1L1	America(85)
3	130747960	130799994	PLXND1	Europe(83)
3	131563329	131712632		Mideast(43),Europe(43)
3	135883720	136115377	EPHB1	Europe(98),Easia(70)
3	141568717	141813475	CLSTN2	Csasia(36),Mideast(47)
3	162542311	162641004	C3orf57	Europe(78),Easia(65)
3	167211162	167407865		Csasia(41)
3	179574321	180056388	KCNMB2	Oceania(65)
4	5892563	6031011	CRMP1	Easia(52)
4	30070637	30277633		Mideast(76)
4	33317259	33443350		Csasia(85)
4	34024974	34272219		Csasia(92),Mideast(9),Europe(13),Easia(68)
4	41347050	41550330	PHOX2B,LIMCH1	Oceania(97),Easia(34)
4	41698428	41891962	SLC30A9	Csasia(8),Easia(10)
4	60513342	60747153		Mideast(58)
4	60847985	61054173		Mideast(7),Europe(28),America(51)
4	65850259	66064755	EPHA5	Oceania(81)
4	74949095	75076572	PF4,CXCL1	Mideast(49),Easia(89)
4	82038098	82361575	PRKG2,BMP3	Mideast(5),Europe(11)
4	95660615	95847504	PDLIM5	Oceania(51)
4	122784822	122882736	ANXA5	America(61)
4	123168777	123246319		Csasia(67)
4	140642328	140727332	SETD7	Mideast(36)
4	148007195	148240594	TTC29	Europe(59)
4	158579217	159059047		America(42),Easia(42)
4	160707662	160850092		America(63)
4	170184337	170559688	NEK1	Oceania(62),Mideast(66),Easia(73)
4	170787400	171140740	C4orf27,CLCN3	Oceania(59)
4	171823438	171997084		Csasia(79),Europe(67),Easia(62)
5	11645576	11788134	CTNND2	Mideast(45)
5	19537898	20418414	CDH18	Csasia(3),Mideast(8),Europe(3)
5	21005826	21245869		Mideast(82)
5	24499057	24675678	CDH10	Europe(62)
5	42279238	42441268		Easia(55)
5	50806839	51053369		Easia(67)
5	58465399	59278256	PDE4D	Oceania(60)
5	63900153	64002911	RGS7BP	Oceania(22)
5	68315467	68652087	SLC30A5,MRPS36,CDK7,CENPH,CCNB1	Csasia(4),Oceania(55),Mideast(15),Europe(4)
5	70807449	71024374		Csasia(6),Mideast(4),Europe(8),America(55),Easia(4)
5	96737597	96797130		Europe(39)
5	98301762	98524624		Csasia(94),Easia(45)
5	99963680	100132867		Oceania(39)
5	107153700	107522176		America(32)
5	107956758	108094579		America(33),Easia(30)
5	109638118	110383304	SLC25A46	Csasia(55),Mideast(38),Europe(23),Europe(97)
5	111470993	111731378	EPB41L4A	America(37)
5	112422279	112588901	MCC	Mideast(90),Europe(44)
5	117311061	117743594		Easia(61)
5	124316859	124379543		America(90)
5	131343783	131643492	PDLIM4,IL3,ACSL6,P4HA2,CSF2	Csasia(47),Mideast(88),Europe(66),America(47)
5	134797726	134854708	C5orf20	Europe(53)
5	136031051	136088791		America(30)
5	150352740	150414915	TNIP1	America(29)
5	169061862	169202577	DOCK2	America(27),Easia(29)
5	173139052	173221642		America(25)
5	175140213	175248681	CPLX2	Oceania(29)
6	28204259	28424457	ZNF193,ZKSCAN4,ZSCAN16,ZNF323,ZNF192,PGBD1	Mideast(55)
6	29379991	29463127	OR12D3,OR5V1	Mideast(40)
6	29808162	30050170	HLA-A,HLA-A29.1,HLA-G	Oceania(73)
6	34536690	34663687	SPDEF,PACSIN1	America(66)
6	35012070	35211996		America(50)
6	44683424	44906595	SUPT3H	Oceania(95)
6	47419368	47479851		America(60)
6	47790908	47854941	GPR115	America(48)
6	48704107	48959748		America(35)
6	52110788	52325334	MCM3,IL17A,IL17F	America(45)
6	56311697	56415196		America(17)
6	70005192	70064271	BAI3	Easia(76)
6	76686994	76801018	IMPG1	Oceania(38)
6	84231662	84287372	PRSS35	Mideast(37),Europe(32)
6	88049809	88192427	C6orf162,GJB7	America(79)
6	105650812	105729214	POPDC3,BVES	Csasia(19),Oceania(28),Mideast(53)
6	105834466	106150328	PREP	Csasia(10),Oceania(26),Mideast(2),Europe(9),America(39), Easia(18)
6	108024122	108269285		Mideast(21)
6	109124015	109186957		Oceania(58)
6	119104805	119171342		America(74)
6	119415862	119569093	MAN1A1	America(98)
6	125723301	125898616		Easia(91)
6	126157076	126313196	NCOA7	Easia(98)
6	134779781	134836852		Easia(100)
6	135983812	136246198	PDE7B	Csasia(93)
6	142910792	143054007		Europe(18)
7	18666000	18827285	HDAC9	Europe(88)
7	75009358	75073485	HIP1	Europe(2),America(2)
7	79495301	79578092		Oceania(79)
7	86057991	86548288	GRM3	Csasia(65)
7	102847563	102978664	SLC26A5	Mideast(92),Europe(40)
7	108165353	108544797		Csasia(37),Mideast(32),Europe(22)
7	110266771	110395373	IMMP2L	Europe(100)
7	110516827	110651535	LRRN3,IMMP2L	Europe(64)
7	111851474	112105091	IFRD1,C7orf53	Easia(20)
7	112413077	112550595	GPR85	Easia(35)
7	117442816	117571663		Csasia(88)
7	118009548	118447850		Csasia(81)
7	118562337	118731207		Csasia(74)
7	119064373	119644092		Csasia(12),Mideast(11),Europe(15)
7	119833141	120192571	KCND2	Csasia(54),Europe(81)
7	126846472	127024239	GCC1,FSCN3,ARF5	Easia(97)
7	135381576	135715174		America(89),Easia(93)
7	146584654	146689924	CNTNAP2	Oceania(69)
8	1884656	2110516	ARHGEF10,KBTBD11	Oceania(91)
8	9730235	9843105		Mideast(97)
8	10990502	11156393	XKR6	Csasia(78)
8	11319676	11537376	BLK	Oceania(4),Easia(16)
8	11646825	11894726	DEFB137,CTSB,FDFT1,GATA4,DEFB134,NEIL2,DEFB136	Csasia(1),America(5)
8	14924819	15453141	TUSC3,SGCZ	Oceania(23),America(68)
8	15571220	15749841	TUSC3	Oceania(21)
8	16290025	16565923		Csasia(23),Mideast(48),Europe(27)
8	17656166	17958250	PCM1,MTUS1,ASAH1,FGL1	Csasia(46),Mideast(16),Europe(60)
8	19404254	19872959	INTS10,LPL	Oceania(35)
8	28677556	28749748	INTS9	Mideast(34)
8	47814647	48013823		Csasia(44),Europe(54),Easia(49)
8	51619972	51718637	SNTG1	Europe(31),Easia(41)
8	52309836	52887231		Mideast(44),Europe(74)
8	53063166	53273627	ST18	Csasia(89),Mideast(79),Europe(41)
8	61120304	61213682		America(91)
8	63523897	63821557	NKAIN3	Oceania(72)
8	64356401	64762756		Oceania(34)
8	66485914	66620150		Mideast(65)
8	67523818	67578641		Easia(74)
8	68570992	68687915	CPA6	Csasia(71),Mideast(72)
8	79982671	80051463		Csasia(28)
8	82044517	82194738	PAG1	America(86)
8	84487931	84759510		Csasia(99)
8	85874330	85996372	RALYL	Europe(77)
8	87029998	87310831	PSKH2,ATP6V0D2	Mideast(75)
8	99384758	99505517		Oceania(2)
8	111619723	111796140		America(100)
8	114827344	115097529		America(96)
8	120655798	120764223	ENPP2	Oceania(85)
8	135004538	135283779		Oceania(77),Easia(50)
8	138873579	139160156		Easia(15)
8	139601462	139777590		Csasia(77)
9	202761	385025	DOCK8	Oceania(9)
9	622149	912574	DMRT1	Oceania(17)
9	11012581	11208042		Csasia(30),Oceania(68),Mideast(98),America(22),Easia(33)
9	12480602	12765488	TYRP1	Mideast(46),Europe(42),America(65)
9	23063969	23189959		Easia(59)
9	26443808	26775734		Oceania(7),Easia(75),Easia(37)
9	36947447	37026247	PAX5	America(43)
9	38630561	38761460		Mideast(1),Europe(1),America(1)
9	93598219	93803611	ROR2	Csasia(56),Europe(70)
9	95392940	95451777		Oceania(94)
9	103983496	104083569		America(10),Easia(22)
10	2771282	2981774		America(57)
10	8992879	9075624		Oceania(89)
10	11119172	11288503	CUGBP2	Easia(43)
10	22517504	22595247		Csasia(98)
10	22767397	22966999	PIP4K2A	Csasia(43)
10	23979411	24256162		Csasia(97)
10	25746238	26024447	GPR158	Mideast(54),Europe(72),Easia(71)
10	31026706	31199747	ZNF438	America(62)
10	49103021	49162038	FRMPD2	Csasia(84)
10	50578070	50655251	OGDHL	Oceania(40)
10	58171445	58762357		Europe(63),Easia(87)
10	59244741	59507178		Csasia(7),Easia(99)
10	65232542	65562077		Csasia(91),Oceania(66),Mideast(100),Easia(77)
10	72146342	72206703	C10orf27	America(28)
10	73401448	74032361	DNAJB12,CHST3,SPOCK2,DDIT4	Csasia(60),Oceania(3),Mideast(95)
10	76478827	76538473	DUPD1,DUSP13	Oceania(53)
10	81676060	81749934	SFTPD	Europe(46)
10	91576473	91734313		Oceania(1),Easia(3)
10	93308518	93437843	PPP1R3C	Easia(39)
10	94471897	94551184		Easia(72)
10	110329672	110387604		Oceania(30)
10	115061347	115577000	HABP2,NRAP,CASP7	America(3)
11	7837104	7923891	OR10A3,OR10A6	Csasia(73)
11	25138024	25608914		Oceania(99),Easia(64)
11	28647863	28711237		Oceania(15)
11	31827749	32035797		Oceania(56)
11	39562554	39888694		Csasia(50),Europe(95),Easia(80)
11	40976791	41105009		Csasia(38),Oceania(63)
11	45661499	45891829	CRY2,PEX16,MAPK8IP1	Oceania(67)
11	48008018	48250507	PTPRJ,OR4X2,OR4B1,OR4X1	Mideast(13)
11	60484897	60674104	CD6,VPS37C,CD5	America(81),Easia(36)
11	71316689	71529215	IL18BP,RNF121,LRRC51,NUMA1,C11orf51	Mideast(68)
11	71862239	72072094	PDE2A	America(82)
11	92845921	92905153	C11orf75	America(95)
11	98992656	99092323	CNTN5	Mideast(50)
11	104496850	104608758	ICEBERG,CASP12	Mideast(81)
11	104894724	104990054	GRIA4	Mideast(29),Europe(90)
12	1380766	1481124	ERC1	America(52)
12	2593527	2757207	CACNA1C	Csasia(39),Europe(36)
12	9201262	9415008		America(19)
12	10649795	10711585	STYK1,MAGOHB	America(49)
12	18958335	19152567		Europe(55)
12	26206349	26756547	SSPN,ITPR2	America(72)
12	30817301	31041450	TSPAN11	America(41)
12	55503625	55609790		America(15)
12	56134906	56362782	B4GALNT1,MBD6,INHBE,DDIT3,GLI1, ARHGAP9,SLC26A10,MARS,DCTN2,DTX3,GEFT,KIF5A	Mideast(93)
12	59081129	59165755		Oceania(49)
12	66073037	66131266		Oceania(46)
12	70646531	70700438	TPH2	Csasia(17),Mideast(10),Europe(5)
12	75061905	75190027		Csasia(16),Oceania(20),Mideast(33),Europe(14), America(21),Easia(17)
12	79126132	79540903		Csasia(80)
12	94905363	94962772	HAL,LTA4H	America(84)
12	98783126	98969115		Easia(6)
12	119541019	119617420	CABP1,KIAA0152	Oceania(11)
12	122665878	122942000	ATP6V0A2,GTF2H3,EIF2B1,DDX55,TCTN2	Easia(63)
12	125401034	125632409		America(77)
13	18523269	18646709	TUBA3C	Csasia(45),Europe(50)
13	18792163	18872511		Csasia(18),Europe(25),Easia(23)
13	20696497	20824900		Oceania(14),Easia(40)
13	32347863	32453320		America(46)
13	33386532	33519121	RFC3	Csasia(58),Mideast(64),Europe(33)
13	34950924	35070825		Mideast(20)
13	43684153	43806741		Oceania(83)
13	51335041	51446141	CCDC70,ATP7B	Europe(37)
13	63372180	63511438		Europe(86)
13	68110635	68494810		Oceania(42)
13	71394590	71571034		Mideast(69)
13	73444223	73646271	KLF12	Easia(31)
13	84707599	84800210		Oceania(24)
13	85144309	85247346		Oceania(80)
13	95797481	95922958	HS6ST3	Europe(12)
14	23866653	23942757	ADCY4,RIPK3,NFATC4,KIAA1305	Oceania(10)
14	24282715	24495122	STXBP6	America(87)
14	35463663	35558504		Mideast(61),Europe(68)
14	37285717	37473540	TTC6	Oceania(64)
14	41260966	41395425	LRFN5	Oceania(45)
14	41782016	41940211		Oceania(86)
14	60880705	61190328	PRKCH	Mideast(77),Europe(35)
14	61789588	62070511		Csasia(42),America(71)
14	62404475	62522165	KCNH5	Csasia(82)
14	62711170	63099534	RHOJ,PPP2R5E	Csasia(48),Mideast(60),Europe(65)
14	63420707	63634280	SYNE2	Csasia(20),Europe(30)
14	65484357	65864678		Csasia(49),Mideast(52),Europe(17)
14	66946945	67006235	PLEK2	Europe(96)
15	21252200	21333227		Csasia(64),Europe(19)
15	25945660	26009415	OCA2	Easia(88)
15	27082938	27169755	APBA2	Mideast(89)
15	28853522	29257220	MTMR10,MTMR15	Csasia(66),Oceania(100),Europe(79),America(92),Easia(7)
15	37708424	38166552	GPR176,SRP14,EIF2AK4	America(93)
15	41889620	42014562	MFAP1,FRMD5	Csasia(33),Easia(27)
15	43734911	43811643	SQRDL	America(88)
15	46305485	46606794	DUT,SLC12A1,SLC24A5	Mideast(63),Europe(48),Europe(91)
15	52586145	52744634	UNC13C	Csasia(96)
15	54598496	54755413	ZNF280D	Csasia(14),Europe(10)
15	61458525	61622914	USP3,CA12	America(67),Easia(57)
15	61887494	62126801	DAPK2	Csasia(27),Oceania(90),America(8),Easia(2)
15	67178532	67453730	GLCE,PAQR5	Europe(20)
15	67558955	67720805		Csasia(22),Mideast(39),Europe(38)
15	69851773	69906623	MYO9A,THSD4	Mideast(67)
15	71856762	72028677	TBC1D21,LOXL1	America(58)
16	30383817	30461660	ZNF768,ZNF747,ITGAL	Easia(85)
16	31255249	31328918	ITGAD,ITGAX	America(34)
16	64324782	64460451		Easia(84)
16	76129345	76181185		Easia(51)
16	78329567	78722136		Mideast(99),Europe(87)
17	34511428	34576277	PLXDC1	America(24)
17	51173101	51478140	PCTP	Mideast(83),Europe(52)
17	53149218	53372082	MRPS23	Easia(78)
17	55508989	55680650	CA4,USP32	Csasia(100)
17	55857642	56141407	PPM1D,APPBP2	Csasia(21),Mideast(27),Europe(29),Easia(26)
17	56516428	56726816		Csasia(9),Europe(26),America(53),Easia(19)
17	59722484	59816347	PECAM1	Mideast(31)
18	19828457	19913537		Mideast(22),Europe(56)
18	21650345	21828290		Csasia(29),America(23)
18	24737128	25020303		Oceania(47),Europe(47)
18	36533818	36612753		Oceania(76)
18	48842258	49047069	DCC	Csasia(95)
18	55803729	55877839		Mideast(62)
19	22531602	22591133		Mideast(94)
19	23415986	23506281		America(76)
20	9310880	9546144	PAK7,C20orf103,PLCB4	Mideast(41)
20	15684550	15826091		Csasia(87),Europe(80)
20	21484958	22608395	FOXA2,PAX1	Csasia(24),Mideast(57),Europe(89),Europe(75)
20	22432805	22728354	FOXA2	Mideast(91)
20	32934175	33254942	MYH7B,TRPC4AP,GSS,EDEM2,ACSS2,PROCR	America(78),Easia(54)
20	52405258	52691396	DOK5	Csasia(61)
20	52882032	53307954		Csasia(57),Mideast(86),Europe(69)
20	58231094	58495497		Easia(94)
21	14771576	14830944	SAMSN1	America(4)
21	15836442	15991090		Easia(58)
21	16242346	16334015		Easia(92)
21	16481096	16591440		Csasia(51),Oceania(43)
21	17547226	17709789		Csasia(40),Oceania(27)
21	29021276	29122990		Csasia(32),Europe(51)
21	29769984	30053605	GRIK1	Mideast(70),Europe(93)
22	16938511	17006900	PEX26,TUBA8	Csasia(13),Europe(21)
22	19674884	19782237	SLC7A4,P2RX6,LZTR1	America(80)
22	24958105	25122793		Oceania(44)
22	33607037	33674317		Csasia(31),Oceania(13)
22	36120057	36307427	CARD10,ELFN2,LGALS2,MFNG,CDC42EP1	America(20)
22	39736865	40313884	TEF,POLR3H,L3MBTL2,ACO2,CSDC2,PMM1,TOB2,PHF5A	Oceania(57)
22	40911192	41203476	NFAM1,TCF20	Oceania(12)
22	44385321	44630277	ATXN10	Oceania(32)
22	44856859	45233062	PKDREJ,PPARA,GTSE1,TRMU,CELSR1	Oceania(41)
